# Supplementary material
Source: PubMed Central journal article supplement (PMC3309182)
Supplement: mmc1.pdf [file mmc1.pdf]

**The American Journal of Human Genetics, Volume 90  
Supplemental Data**

**The Basque Paradigm: Genetic Evidence of a Maternal  
Continuity in the Franco-Cantabrian  
Region since Pre-Neolithic Times**

**Doron M. Behar, Christine Harmant, Jeremy Manry, Mannis van Oven, Wolfgang Haak, Begoña  
Martinez-Cruz, Jasone Salaberria, Bernard Oyharçabal, Frédéric Bauduer, David Comas, and Lluís  
Quintana-Murci, The Genographic Consortium**

## Supplementary Acknowledgements

### Genographic Consortium Members

Syama Adhikarla (Madurai Kamaraj University, Madurai, Tamil Nadu, India), Christina J. Adler (University of Adelaide, South Australia, Australia), Elena Balanovska (Research Centre for Medical Genetics, Russian Academy of Medical Sciences, Moscow, Russia), Oleg Balanovsky (Research Centre for Medical Genetics, Russian Academy of Medical Sciences, Moscow, Russia), Jaume Bertranpetit (Universitat Pompeu Fabra, Barcelona, Spain), Andrew C. Clarke (University of Otago, Dunedin, New Zealand), Alan Cooper (University of Adelaide, South Australia, Australia), Clio S. I. Der Sarkissian (University of Adelaide, South Australia, Australia), Matthew C. Dulik (University of Pennsylvania, Philadelphia, Pennsylvania, United States), Jill B. Gaieski (University of Pennsylvania, Philadelphia, Pennsylvania, United States), ArunKumar GaneshPrasad (Madurai Kamaraj University, Madurai, Tamil Nadu, India), Angela Hobbs (National Health Laboratory Service, Johannesburg, South Africa), Asif Javed (IBM, Yorktown Heights, New York, United States), Li Jin (Fudan University, Shanghai, China), Matthew E. Kaplan (University of Arizona, Tucson, Arizona, United States), Shilin Li (Fudan University, Shanghai, China), Elizabeth A. Matisoo-Smith (University of Otago, Dunedin, New Zealand), Marta Melé (Universitat Pompeu Fabra, Barcelona, Spain), Nirav C. Merchant (University of Arizona, Tucson, Arizona, United States), R. John Mitchell (La Trobe University, Melbourne, Victoria, Australia), Amanda C. Owings (University of Pennsylvania, Philadelphia, Pennsylvania, United States), Laxmi Parida (IBM, Yorktown Heights, New York, United States), Ramasamy Pitchappan (Madurai Kamaraj University, Madurai, Tamil Nadu, India), Daniel E. Platt (IBM, Yorktown Heights, New York, United States), Colin Renfrew (University of Cambridge, Cambridge, United Kingdom), Daniela R. Lacerda (Universidade Federal de Minas Gerais, Belo Horizonte, Minas Gerais, Brazil), Ajay K. Royyuru (IBM, Yorktown

Heights, New York, United States), Fabrício R. Santos (Universidade Federal de Minas Gerais, Belo Horizonte, Minas Gerais, Brazil), Theodore G. Schurr (University of Pennsylvania, Philadelphia, Pennsylvania, United States), Himla Soodyall (National Health Laboratory Service, Johannesburg, South Africa), David F. Soria Hernanz (National Geographic Society, Washington, District of Columbia, United States), Pandikumar Swamikrishnan (IBM, Somers, New York, United States), Chris Tyler-Smith (The Wellcome Trust Sanger Institute, Hinxton, United Kingdom), Arun Varatharajan Santhakumari (Madurai Kamaraj University, Madurai, Tamil Nadu, India), Pedro Paulo Vieira (Universidade Federal do Rio de Janeiro, Rio de Janeiro, Brazil), Miguel G. Vilar (University of Pennsylvania, Philadelphia, Pennsylvania, United States), R. Spencer Wells (National Geographic Society, Washington, District of Columbia, United States), Janet S. Ziegler (Applied Biosystems, Foster City, California, United States).



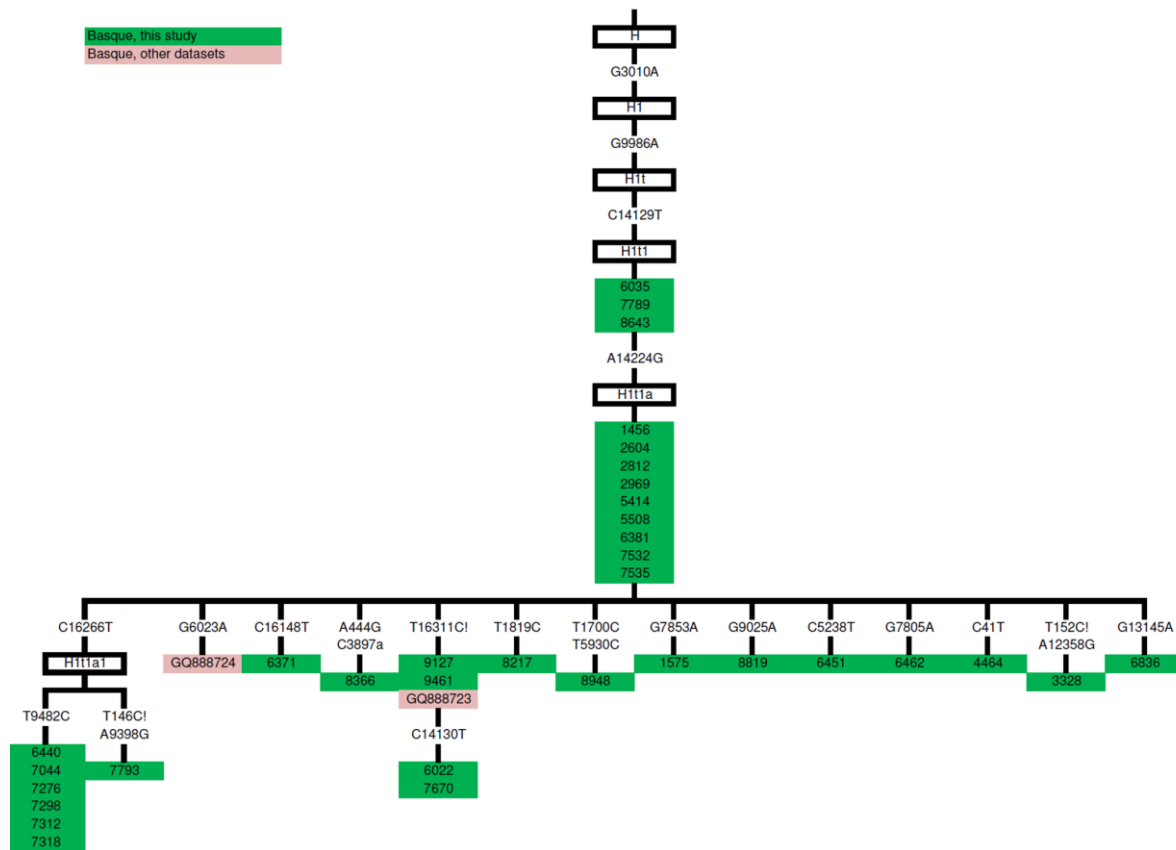

**Figure S2. Haplogroup H1t1 Phylogeny**

Detailed representation of the most parsimonious haplogroup H1t1 mtDNA phylogeny inferred from 36 complete mtDNA sequences. Phylogeny annotations follow those specified in Figure S1.

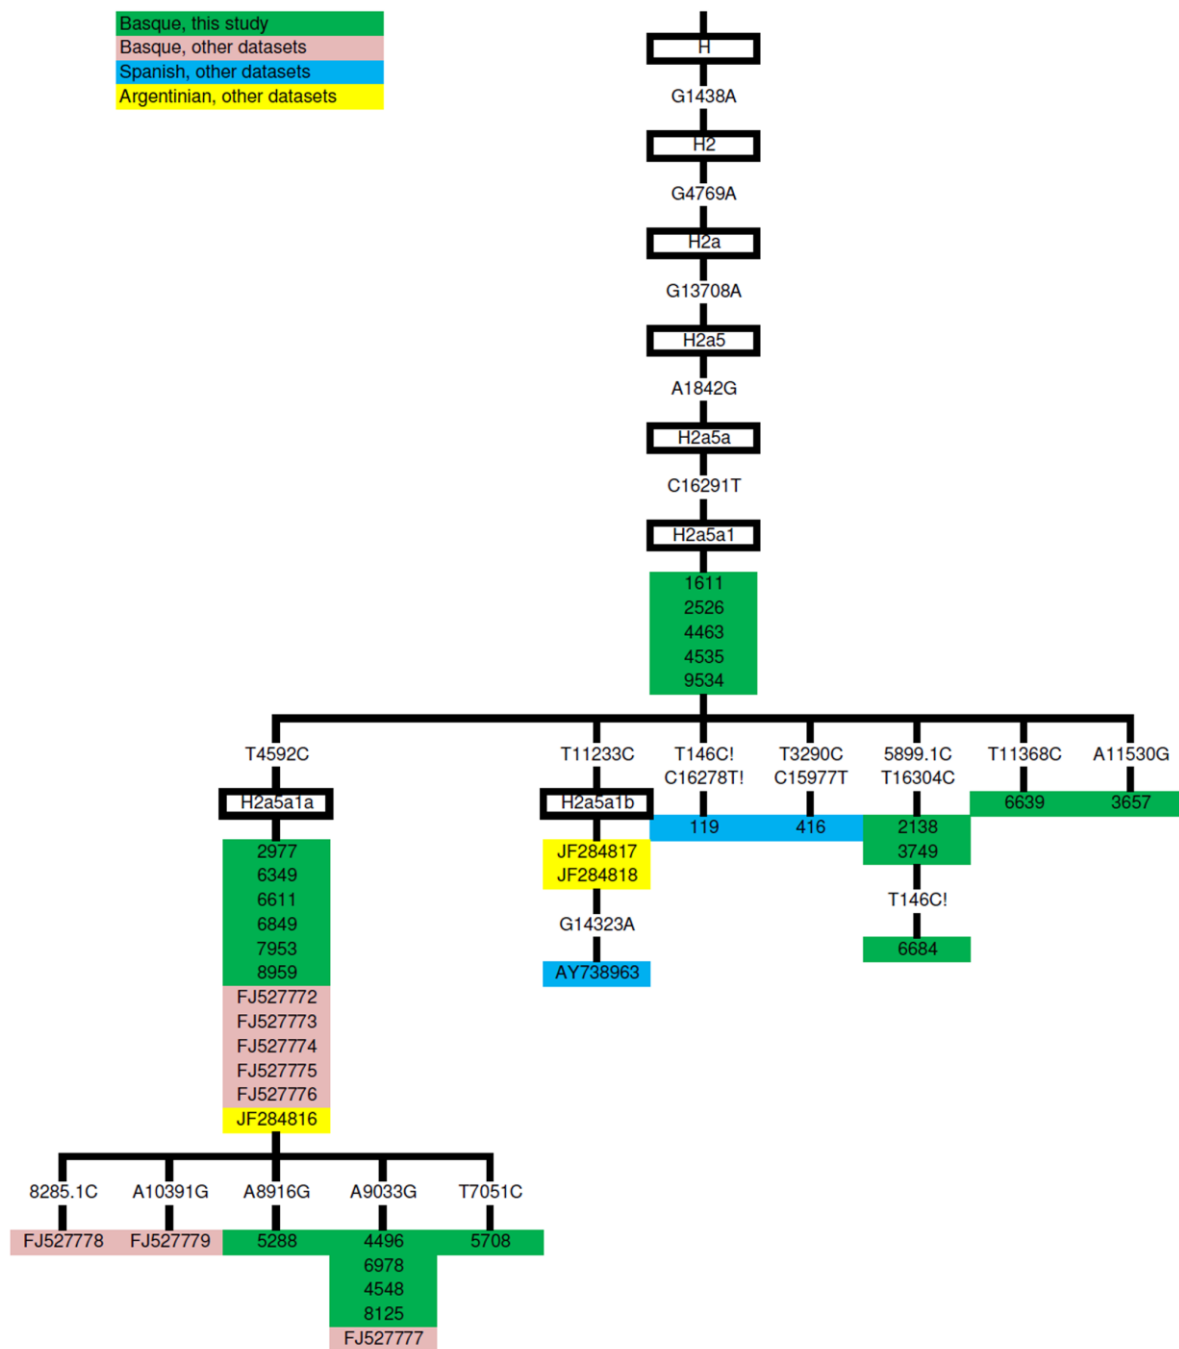

**Figure S3. Haplogroup H2a5a1 Phylogeny**

Detailed representation of the most parsimonious haplogroup H2a5a1 mtDNA phylogeny inferred from 36 complete mtDNA sequences. Phylogeny annotations follow those specified in Figure S1.

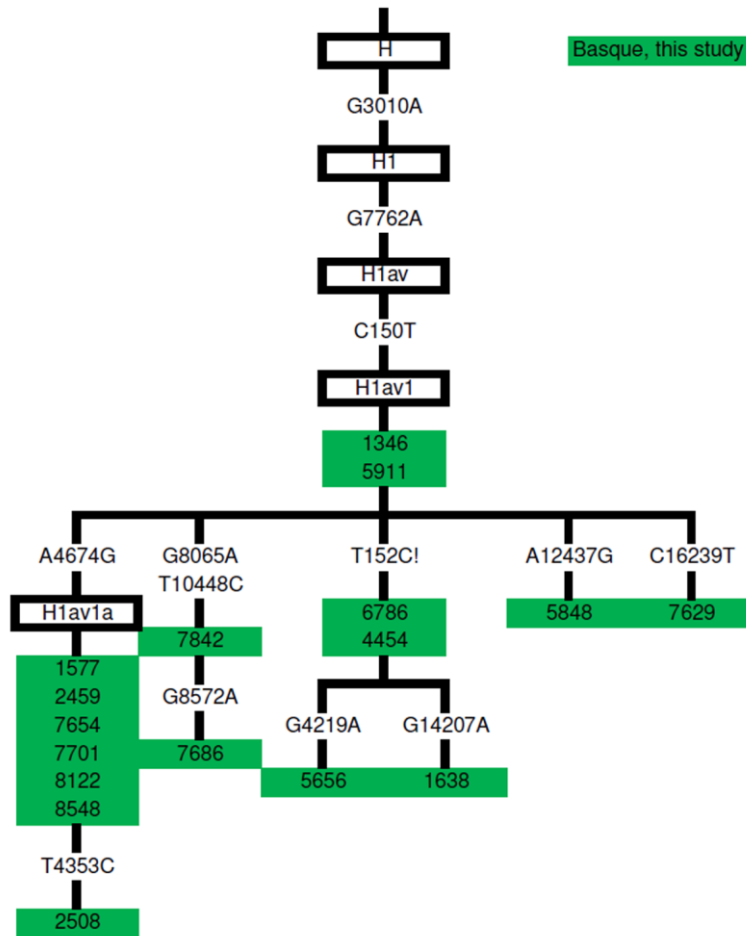

**Figure S4. Haplogroup H1av1 Phylogeny**

Detailed representation of the most parsimonious haplogroup H1av1 mtDNA phylogeny inferred from 17 complete mtDNA sequences. Phylogeny annotations follow those specified in Figure S1.

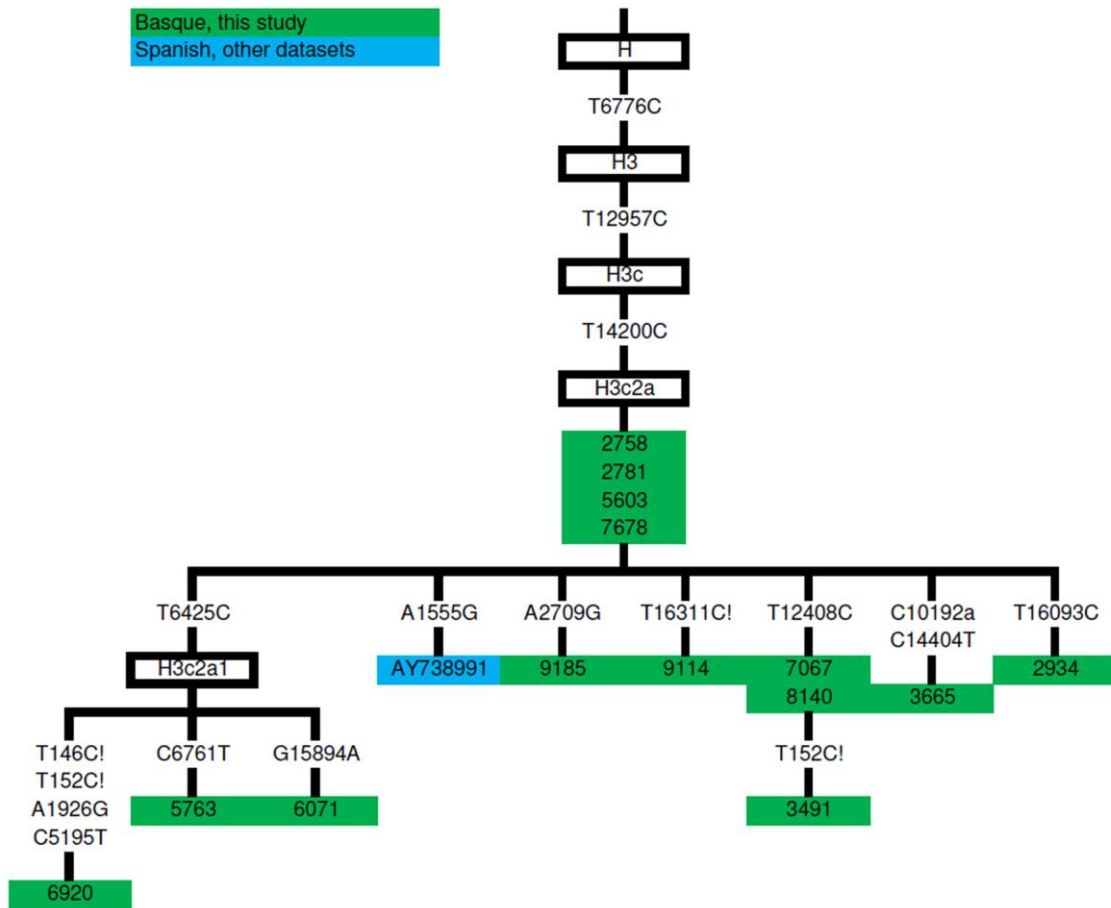

**Figure S5. Haplogroup H3c2a Phylogeny**

Detailed representation of the most parsimonious haplogroup H3c2a mtDNA phylogeny inferred from 15 complete mtDNA sequences. Phylogeny annotations follow those specified in Figure S1.



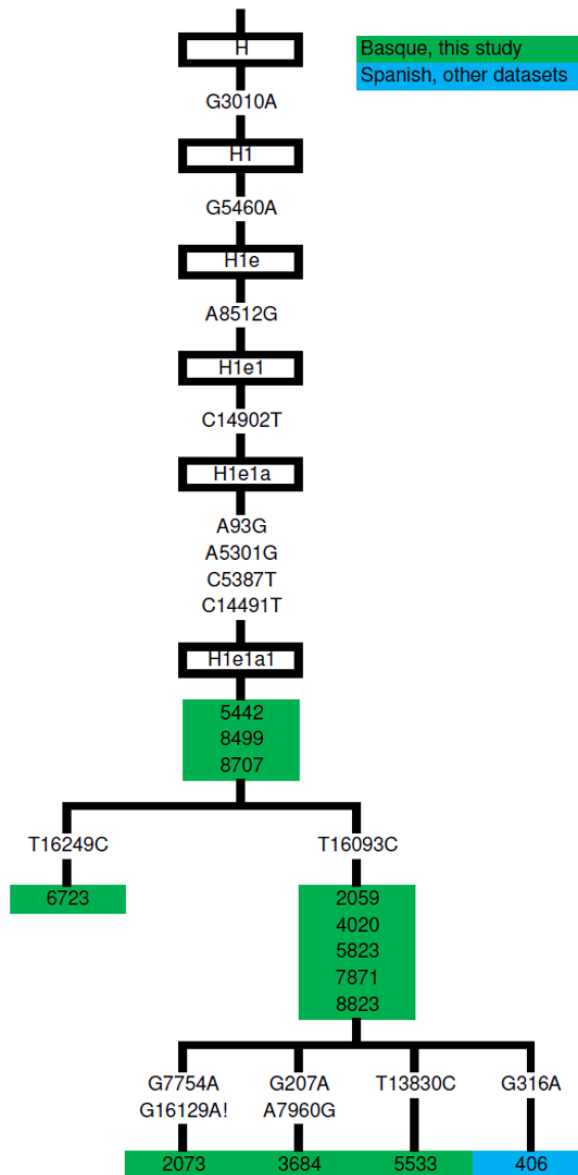

**Figure S6. Haplogroup H1e1a1 Phylogeny**

Detailed representation of the most parsimonious haplogroup H1e1a1 mtDNA phylogeny inferred from 13 complete mtDNA sequences. Phylogeny annotations follow those specified in Figure S1.

**Table S1. Basque and Non-Basque speaking Populations Used in the Present Study**

| <b>Zone</b> | <b>Location</b> | <b>Language</b> | <b>Region</b>                                       | <b>Sample size</b> |
|-------------|-----------------|-----------------|-----------------------------------------------------|--------------------|
| A           | 1               | French (Gascon) | Bigorre                                             | 48                 |
| A           | 2               | French (Gascon) | Bearn                                               | 56                 |
| A           | 3               | French (Gascon) | Chalosse                                            | 60                 |
| B           | 4               | Basque          | Lapurdi/Baztan                                      | 58                 |
| B           | 5               | Basque          | Lapurdi Nafarroa                                    | 73                 |
| B           | 6               | Basque          | Zuberoa                                             | 62                 |
| C           | 7               | Basque extinct  | North Eastern Nafarroa (Roncal and Salazar valleys) | 55                 |
| C           | 8               | Basque extinct  | Central Western Nafarroa                            | 64                 |
| C           | 12              | Basque extinct  | Araba                                               | 56                 |
| D           | 9               | Basque          | North Western Nafarroa                              | 53                 |
| D           | 10              | Basque          | Gipuzkoa                                            | 56                 |
| D           | 11              | Basque          | South Western Gipuzkoa                              | 63                 |
| D           | 13              | Basque          | Bizkaia                                             | 59                 |
| E           | 14              | Castilian       | Western Bizkaia                                     | 21                 |
| F           | 15              | Castilian       | Cantabria                                           | 19                 |
| F           | 16              | Castilian       | Northern Burgos                                     | 24                 |
| F           | 17              | Castilian       | La Rioja                                            | 52                 |
| F           | 18              | Castilian       | Northern Aragon                                     | 29                 |

**Table S2. Haplogroup Affiliation and HVSI/II Sequences in the 908 Samples of the Present Study**

| ID   | ZC <sup>a</sup> | ZCd <sup>b</sup> | Region     | From np 16024 to np 16569 (including HVS-I)                              | From np 1 to np 576 (including HVS-II).                               | HG |
|------|-----------------|------------------|------------|--------------------------------------------------------------------------|-----------------------------------------------------------------------|----|
| 1111 | A               | 1                | Bigorre    | 16114a 16189C 16234T 16519C                                              | 263G 315.1C                                                           | H  |
| 1112 | A               | 1                | Bigorre    | 16114a 16189C 16234T 16519C                                              | 263G 315.1C                                                           | H  |
| 1118 | A               | 1                | Bigorre    | 16093C 16223T 16234T 16288C 16293G 16298C 16327T 16518t 16519C<br>16527T | 054A 073G 249d 263G 309.1C 309.2C 315.1C 489C                         | C  |
| 1122 | C               | 8                | Navarra CW | 16294T 16519C                                                            | 263G 291.1A 309.1C 315.1C                                             | H  |
| 1123 | C               | 8                | Navarra CW | CRS                                                                      | 263G 315.1C                                                           | H  |
| 1136 | C               | 8                | Navarra CW | 16298C                                                                   | 072C 150T 263G 309.1C 315.1C                                          | V  |
| 1142 | F               | 17               | La Rioja   | 16209C 16519C                                                            | 185A 263G 315.1C                                                      | H  |
| 1169 | A               | 1                | Bigorre    | CRS                                                                      | 073G 263G 282C 309.1C 315.1C 523.1C 523.2A                            | U  |
| 1171 | A               | 1                | Bigorre    | 16183c 16189C 16519C                                                     | 263G 309.1C 315.1C 309.1C 315.1C                                      | H  |
| 1177 | A               | 1                | Bigorre    | 16069T 16126C 16311C                                                     | 073G 152C 185A 228A 263G 295T 315.1C 462T 482C 489C                   | J  |
| 1192 | E               | 14               | Biscaye W  | 16233G                                                                   | 195C 263G 315.1C 522d 523d                                            | H  |
| 1194 | E               | 14               | Biscaye W  | 16519C                                                                   | 263G 315.1C                                                           | H  |
| 1206 | E               | 14               | Biscaye W  | 16129A 16311C 16519C                                                     | 260G/T 263G 309.1C 309.2C 315.1C                                      | H  |
| 1211 | E               | 14               | Biscaye W  | 16298C 16311C                                                            | 072C 263G 315.1C                                                      | HV |
| 1216 | B               | 4                | Labourdin  | 16192T 16270T 16319A                                                     | 073G 150T 263G 315.1C 533G                                            | U  |
| 1217 | B               | 4                | Labourdin  | 16129A 16519C                                                            | 263G 309.1C 315.1C                                                    | H  |
| 1231 | B               | 4                | Labourdin  | 16192T 16270T 16319A                                                     | 073G 150T 263G 315.1C 533G                                            | U  |
| 1237 | A               | 1                | Bigorre    | 16183c 16189C 16223T 16278T 16519C                                       | 073G 195C 200G 225A 226C 263G 309.1C 309.2C 315.1C                    | X  |
| 1241 | A               | 3                | Chalosse   | 16304C                                                                   | 263G 309.1C 315.1C 456T                                               | H  |
| 1251 | A               | 3                | Chalosse   | CRS                                                                      | 263G 309.1C 309.2C 315.1C 573.XC                                      | H  |
| 1256 | C               | 8                | Navarra CW | 16214T 16343G 16390A 16519C 16527T                                       | 073G 150T 263G 315.1C                                                 | U  |
| 1262 | C               | 8                | Navarra CW | 16129A 16223T 16391A 16519C                                              | 073G 199C 204C 250C 263G 309.1C 315.1C 573.XC                         | I  |
| 1266 | C               | 8                | Navarra CW | 16145A 16176g 16223T 16352C 16390A                                       | 073G 106d 107d 108d 109d 110d 111d 152C 195C 263G<br>315.1C 522d 523d | N1 |
| 1267 | C               | 8                | Navarra CW | 16519C                                                                   | 263G 309.1C 315.1C                                                    | H  |
| 1275 | B               | 4                | Labourdin  | 16519C                                                                   | 152C 263G 309.1C 315.1C                                               | H  |
| 1285 | B               | 4                | Labourdin  | 16192T 16270T 16319A                                                     | 073G 150T 263G 315.1C 533G                                            | U  |
| 1298 | B               | 4                | Labourdin  | 16519C                                                                   | 263G 309.1C 309.2C 315.1C 477C                                        | H  |
| 1299 | A               | 3                | Chalosse   | 16069T 16126C                                                            | 073G 228A 263G 295T 309.1C 315.1C 462T 482C 489C                      | J  |
| 1321 | A               | 3                | Chalosse   | CRS                                                                      | 263G 309.1C 309.2C 315.1C 573.XC                                      | H  |
| 1323 | A               | 3                | Chalosse   | 16294T 16519C                                                            | 263G 315.1C                                                           | H  |
| 1324 | C               | 7                | Navarra NE | 16126C 16266T 16291T 16294T 16304C 16519C                                | 073G 263G 309.1C 315.1C 385G                                          | T  |
| 1325 | C               | 7                | Navarra NE | 16192T 16270T 16319A                                                     | 073G 150T 263G 315.1C 533G                                            | U  |
| 1337 | E               | 14               | Biscaye W  | 16184T                                                                   | 044.1C 055C 057C 146C 263G 309.1C 309.2C 315.1C                       | H  |
| 1339 | E               | 14               | Biscaye W  | 16311C 16519C                                                            | 263G 315.1C                                                           | H  |
| 1342 | F               | 17               | La Rioja   | 16129A 16519C                                                            | 263G 315.1C                                                           | H  |
| 1346 | F               | 17               | La Rioja   | 16519C                                                                   | 150T 263G 315.1C                                                      | H  |
| 1349 | F               | 17               | La Rioja   | 16037G 16368C 16519C                                                     | 263G 315.1C 522d 523d                                                 | H  |
| 1352 | A               | 3                | Chalosse   | CRS                                                                      | 263G 309.1C 309.2C 315.1C 573.XC                                      | H  |
| 1357 | A               | 3                | Chalosse   | 16129A 16519C                                                            | 263G 309.1C 309.2C 315.1C                                             | H  |
| 1360 | A               | 3                | Chalosse   | 16104T 16176T 16311C 16362C 16519C                                       | 263G 309.1C 315.1C                                                    | H  |
| 1370 | E               | 14               | Biscaye W  | 16189C 16256T 16270T                                                     | 073G 150T 200G 263G 309.1C 315.1C                                     | U  |
| 1377 | A               | 1                | Bigorre    | 16126C 16223T 16294T 16296T 16304C 16519C                                | 073G 199C 204C 263G 309.1C 315.1C 573.XC                              | T  |
| 1386 | A               | 1                | Bigorre    | 16224C 16311C 16519C                                                     | 073G 152C 263G 315.1C 497T                                            | K  |

|      |   |    |           |                                           |                                                             |    |
|------|---|----|-----------|-------------------------------------------|-------------------------------------------------------------|----|
| 1390 | A | 1  | Bigorre   | 16192T 16270T 16319A                      | 073G 150T 263G 315.1C 533G                                  | U  |
| 1392 | F | 18 | Aragon    | 16298C                                    | 072C 195C 263G 309.1C 309.2C 315.1C 340T 508G 523.1C 523.2A | HV |
| 1401 | F | 18 | Aragon    | 16051G 16129c 16183c 16189C 16362C 16519C | 073G 152C 217C 263G 309.1C 309.2C 315.1C 340T               | U  |
| 1404 | F | 18 | Aragon    | 16176T 16270T 16304C                      | 073G 150T 152C 228A 263G 315.1C                             | U  |
| 1414 | A | 3  | Chalosse  | 16519C                                    | 072C 151T 263G 309.1C 315.1C                                | V  |
| 1427 | A | 3  | Chalosse  | 16298C 16390A 16519C                      | 263G 309.1C 309.2C 315.1C                                   | V  |
| 1436 | A | 3  | Chalosse  | 16482G                                    | 239C 263G 315.1C                                            | H  |
| 1440 | A | 3  | Chalosse  | 16051G 16092C 16162G 16519C               | 073G 263G 315.1C 522d 523d 534T                             | H  |
| 1450 | A | 3  | Chalosse  | 16224C 16519C                             | 073G 152C 263G 315.1C 497T 523.1C 523.2A 523.3C 523.4A      | K  |
| 1456 | A | 3  | Chalosse  | 16519C                                    | 263G 315.1C                                                 | H  |
| 1457 | A | 3  | Chalosse  | 16093C 16172C 16183c 16189C 16219G 16278T | 073G 185A 263G 315.1C                                       | U  |
| 1459 | F | 17 | La Rioja  | 16192T 16270T 16319A                      | 073G 150T 263G 315.1C 533G                                  | U  |
| 1467 | F | 17 | La Rioja  | 16189C 16519C                             | 204C 263G 309.1C 315.1C                                     | H  |
| 1468 | F | 17 | La Rioja  | 16304C                                    | 152C 263G 315.1C 456T                                       | H  |
| 1471 | A | 3  | Chalosse  | CRS                                       | 195C 263G 309.1C 315.1C 522d 523d                           | H  |
| 1478 | A | 3  | Chalosse  | 16192T 16270T 16319A                      | 073G 150T 263G 315.1C 533G                                  | U  |
| 1507 | A | 3  | Chalosse  | 16224C 16519C                             | 073G 152C 263G 315.1C 497T 523.1C 523.2A                    | K  |
| 1510 | A | 1  | Bigorre   | 16126C 16526A                             | 152C 263G 309.1C 309.2C 315.1C                              | H  |
| 1532 | A | 1  | Bigorre   | 16519C                                    | 263G 309.1C 315.1C                                          | H  |
| 1546 | A | 1  | Bigorre   | 16356C 16519C                             | 073G 195C 263G 310C 499A                                    | U  |
| 1560 | A | 1  | Bigorre   | 16298C                                    | 072C 263G 315.1C                                            | V  |
| 1567 | F | 17 | La Rioja  | 16069T 16304C                             | 263G 309.1C 315.1C 456T 522d 523d                           | H  |
| 1571 | F | 17 | La Rioja  | 16519C                                    | 152C 263G 309.1C 309.2C 315.1C                              | H  |
| 1575 | F | 17 | La Rioja  | 16519C                                    | 263G 315.1C                                                 | H  |
| 1577 | D | 13 | Biscaye   | 16519C                                    | 150T 263G 309.1C 315.1C                                     | H  |
| 1589 | D | 13 | Biscaye   | 16293G 16519C                             | 263G 315.1C                                                 | H  |
| 1604 | D | 13 | Biscaye   | 16129A 16519C                             | 263G 309.1C 309.2C 315.1C                                   | H  |
| 1611 | D | 13 | Biscaye   | 16291T 16519C                             | 263G 309.1C 315.1C                                          | H  |
| 1623 | D | 13 | Biscaye   | 16298T                                    | 072C 263G 309.1C 315.1C                                     | V  |
| 1625 | D | 13 | Biscaye   | 16192T 16270T 16319A                      | 073G 150T 263G 315.1C 533G                                  | U  |
| 1634 | D | 13 | Biscaye   | 16519C                                    | 263G 315.1C                                                 | H  |
| 1638 | D | 13 | Biscaye   | 16519C                                    | 150T 152C 263G 309.1C 315.1C                                | H  |
| 1645 | D | 13 | Biscaye   | 16126C 16266T 16294T 16304C 16519C        | 073G 198T 263G 309.1C 315.1C 385G                           | T  |
| 1657 | F | 16 | Burgos    | 16356C 16519C                             | 073G 146C 152C 195C 263G 315.1C 499A                        | U  |
| 1658 | F | 16 | Burgos    | 16189C                                    | 263G 315.1C 522d 523d                                       | H  |
| 1688 | F | 16 | Burgos    | 16189C 16256T 16270T                      | 073G 150T 200G 263G 309.1C 315.1C                           | U  |
| 1689 | A | 2  | Bearn     | 16298C                                    | 072C 263G 309.1C 309.2C 315.1C                              | V  |
| 1698 | A | 2  | Bearn     | 16093C 16311C                             | 150T 212C 263G 309.1C 315.1C                                | HV |
| 1699 | A | 2  | Bearn     | 16192T 16319A                             | 073G 150T 263G 315.1C 533G                                  | U  |
| 1704 | A | 2  | Bearn     | 16311C 16519C                             | 263G 309.1C 315.1C                                          | H  |
| 1715 | F | 17 | La Rioja  | 16129A 16390A 16519C                      | 263G 309.1C 309.2C 315.1C                                   | H  |
| 1719 | F | 17 | La Rioja  | 16069T 16126C                             | 073G 185A 189A/G 263G 295T 315.1C 462T 489C                 | J  |
| 1737 | F | 17 | La Rioja  | 16519C                                    | 263G 315.1C                                                 | H  |
| 1745 | F | 15 | Cantabria | 16519C                                    | 263G 309.1C 315.1C                                          | H  |
| 1751 | F | 17 | La Rioja  | 16189C 16192T 16270T                      | 073G 150T 152C 263G 309.1C 315.1C                           | U  |
| 1757 | F | 17 | La Rioja  | 16129A 16241G 16519C                      | 263G 309.1C 315.1C                                          | H  |
| 1761 | A | 2  | Bearn     | 16189C 16192T 16270T 16319A               | 073G 150T 263G 315.1C 533G                                  | U  |
| 1792 | A | 2  | Bearn     | 16093C 16304g 16311C                      | 263G 315.1C 456T                                            | H  |

|      |   |    |            |                                                  |                                                                 |   |
|------|---|----|------------|--------------------------------------------------|-----------------------------------------------------------------|---|
| 1796 | A | 2  | Bearn      | 16192T 16270T 16319A                             | 073G 150T 263G 315.1C 522d 523d 533G                            | U |
| 1800 | A | 2  | Bearn      | 16519C                                           | 263G 309.1C 315.1C                                              | H |
| 1803 | F | 17 | La Rioja   | 16180G 16224C 16249C 16311C 16519C               | 073G 263G 315.1C 408a 497T 523.1C 523.2A                        | K |
| 1806 | F | 17 | La Rioja   | 16126C 16294T 16296T 16304C 16519C               | 073G 146C 151T 263G 315.1C                                      | T |
| 1807 | F | 17 | La Rioja   | 16519C                                           | 073G 150T 263G 315.1C                                           | U |
| 1808 | F | 17 | La Rioja   | 16051G 16129c 16183c 16189C 16362C 16519C        | 073G 152C 217C 263G 309.1C 315.1C 340T 508G                     | U |
| 1815 | F | 17 | La Rioja   | 16129A 16223T 16261T 16391A 16519C               | 073G 152C 199C 204C 207A 250C 263G 309.1C 315.1C 573.XC         | I |
| 1818 | F | 17 | La Rioja   | 16069T 16126C 16145A 16222T 16261T               | 073G 263G 295T 315.1C 462T 489C                                 | J |
| 1836 | A | 2  | Bearn      | 16192T 16270T 16319A                             | 073G 150T 263G 315.1C 533G                                      | U |
| 1858 | A | 2  | Bearn      | 16145A 16172C 16189C 16243C 16256T 16270T 16399G | 073G 195C 263G 309.1C 315.1C 573.XC                             | U |
| 1861 | F | 17 | La Rioja   | 16189C 16519C                                    | 152C 263G 315.1C                                                | H |
| 1886 | F | 18 | Aragon     | 16256T 16519C                                    | 263G 315.1C                                                     | H |
| 1892 | F | 18 | Aragon     | 16069T 16126C 16185T 16189C                      | 073G 185A 228A 263G 295T 315.1C 462T 489C                       | J |
| 1895 | A | 2  | Bearn      | 16362C                                           | 146C 239C 263G 309.1C 309.2C 315.1C                             | H |
| 1906 | A | 2  | Bearn      | 16224C 16234T 16311C 16519C                      | 073G 146C 150T 263G 315.1C                                      | K |
| 1912 | C | 8  | Navarra CW | 16162G 16209C 16311C 16519C                      | 073G 150T 263G 315.1C                                           | H |
| 1918 | C | 8  | Navarra CW | 16298C                                           | 072C 150T 263G 309.1C 309.2C 315.1C                             | V |
| 1924 | E | 14 | Biscaye W  | 16183c 16189C 16223T 16278T 16519C               | 073G 146C 153G 195C 198T 225A 226C 263G 309.1C 315.1C           | X |
| 1928 | B | 6  | Soule      | 16181c 16182c 16183c 16189C 16519C               | 073G 146C 153G 263G 315.1C 522d 523d                            | X |
| 1934 | B | 6  | Soule      | 16183c 16189C 16223T 16278T 16355T 16519C        | 073G 153G 195C 225A 226C 263G 309.1C 315.1C                     | X |
| 1952 | F | 17 | La Rioja   | 16519C                                           | 263G 315.1C                                                     | H |
| 1954 | F | 17 | La Rioja   | 16519C                                           | 152C 263G 309.1C 315.1C                                         | H |
| 1964 | F | 17 | La Rioja   | 16126C 16169T 16292T 16294T 16519C               | 073G 146C 152C 189G 194.1T 263G 279C 309.1C 315.1C              | T |
| 1979 | C | 8  | Navarra CW | 16270T                                           | 073G 150T 263G 309.1C 315.1C 523.1C 523.2A                      | U |
| 1985 | C | 8  | Navarra CW | 16069T 16126C 16193T 16278T                      | 073G 150T 152C 263G 295T 315.1C 489C                            | J |
| 2006 | C | 8  | Navarra CW | 16519C                                           | 152C 263G 315.1C                                                | H |
| 2014 | C | 8  | Navarra CW | 16153A 16519C                                    | 263G 315.1C                                                     | H |
| 2023 | F | 18 | Aragon     | 16126C 16266T 16294T 16304C 16465T 16519C        | 073G 263G 309.1C 315.1C 385G                                    | T |
| 2025 | F | 17 | La Rioja   | 16126C 16163G 16186T 16189C 16294T 16519C        | 073G 152C 195C 263G 309.1C 309.2C 315.1C                        | T |
| 2038 | F | 17 | La Rioja   | 16183c 16189C 16519C                             | 263G 315.1C                                                     | H |
| 2041 | F | 17 | La Rioja   | CRS                                              | 263G 315.1C                                                     | H |
| 2045 | F | 17 | La Rioja   | 16354T 16519C                                    | 263G 315.1C                                                     | H |
| 2057 | F | 17 | La Rioja   | 16150T 16224C 16311C 16519C                      | 073G 146C 152C 263G 315.1C                                      | K |
| 2059 | A | 3  | Chalosse   | 16093C 16519C                                    | 093G 263G 309.1C 315.1C                                         | H |
| 2069 | A | 3  | Chalosse   | 16519C                                           | 072g 249G 263G 309.1C 309.2C 315.1C                             | H |
| 2073 | A | 3  | Chalosse   | 16093C 16129A 16519C                             | 093G 263G 309.1C 315.1C                                         | H |
| 2076 | A | 3  | Chalosse   | 16093C 16145A 16192T 16270T 16319A               | 073G 150T 263G 315.1C 533G                                      | U |
| 2079 | F | 17 | La Rioja   | 16192T 16270T 16319A                             | 073G 150T 263G 315.1C 533G                                      | U |
| 2083 | F | 17 | La Rioja   | 16129A 16519C                                    | 263G 309.1C 309.2C 315.1C                                       | H |
| 2115 | F | 17 | La Rioja   | 16126C 16183c 16189C 16259T 16294T 16519C        | 073G 152C 263c 309.1C 309.2C 315.1C                             | T |
| 2119 | F | 15 | Cantabria  | 16069T 16126C 16278T 16366T 16519C               | 073G 185A 188G 228A 263G 295T 309.1C 315.1C 462T 489C 522d 523d | J |
| 2131 | F | 15 | Cantabria  | 16129A 16278T 16316G 16519C                      | 150T 263G 315.1C                                                | H |
| 2133 | F | 15 | Cantabria  | 16356C 16519C                                    | 073G 195C 263G 309.1C 315.1C 499A                               | U |
| 2138 | A | 3  | Chalosse   | 16291T 16304C 16519C                             | 263G 309.1C 315.1C                                              | H |
| 2139 | A | 3  | Chalosse   | CRS                                              | 263G 309.1C 309.2C 315.1C 573.XC                                | H |
| 2155 | A | 3  | Chalosse   | 16270T 16319A                                    | 073G 150T 263G 315.1C 533G                                      | U |
| 2170 | A | 3  | Chalosse   | 16356C 16519C                                    | 073G 195C 263G 310C 499A 523.1C 523.2A 523.3C 523.4A            | U |

|      |   |    |              |                                                  |                                                     |    |
|------|---|----|--------------|--------------------------------------------------|-----------------------------------------------------|----|
| 2176 | E | 14 | Biscaye W    | 16239T 16242T 16519C                             | 263G 309.1C 315.1C                                  | H  |
| 2177 | E | 14 | Biscaye W    | 16189C 16519C                                    | 152C 263G 309.1C 315.1C                             | H  |
| 2193 | F | 15 | Cantabria    | 16248T 16519C                                    | 064T 093G 263G 315.1C                               | H  |
| 2200 | F | 15 | Cantabria    | 16086C 16278T 16311C 16519C                      | 073G 263G 315.1C 497T                               | K  |
| 2227 | F | 15 | Cantabria    | 16519C                                           | 152C 263G 309.1C 315.1C                             | H  |
| 2245 | B | 6  | Soule        | 16258c 16298C                                    | 072C 195C 263G 315.1C                               | HV |
| 2246 | B | 6  | Soule        | 16311C 16355T 16519C                             | 150T 263G 309.1C 309.2C 315.1C                      | H  |
| 2248 | B | 6  | Soule        | 16519C                                           | 263G 309.1C 315.1C                                  | H  |
| 2253 | A | 3  | Chalosse     | 16069T 16126C 16300G                             | 073G 185A 228A 263G 295T 315.1C 462T 489C 522d 523d | J  |
| 2258 | A | 3  | Chalosse     | 16519C                                           | 263G 309.1C 315.1C                                  | H  |
| 2262 | A | 3  | Chalosse     | 16126C 16294T 16296T 16324C 16519C               | 073G 263G 309.1C 315.1C                             | T  |
| 2276 | F | 18 | Aragon       | 16235t 16286T                                    | 146C 152C 263G 315.1C                               | H  |
| 2289 | F | 18 | Aragon       | 16093C                                           | 263G 315.1C 522d 523d                               | H  |
| 2291 | F | 18 | Aragon       | 16298C                                           | 072C 263G 309.1C 315.1C                             | V  |
| 2294 | A | 3  | Chalosse     | 16192T 16270T 16319A                             | 073G 150T 263G 315.1C 533G                          | U  |
| 2295 | B | 6  | Soule        | 16192T 16270T 16319A                             | 073G 150T 263G 315.1C 533G                          | U  |
| 2305 | B | 6  | Soule        | 16189C 16293d 16390A 16519C                      | 263G 315.1C                                         | H  |
| 2319 | B | 6  | Soule        | 16311C 16355T 16519C                             | 150T 263G 309.1C 315.1C                             | H  |
| 2325 | A | 3  | Chalosse     | 16519C                                           | 072g 249G 263G 309.1C 315.1C                        | H  |
| 2331 | A | 3  | Chalosse     | 16192T 16270T 16319A                             | 073G 150T 263G 315.1C 533G                          | U  |
| 2340 | A | 3  | Chalosse     | 16126C 16163G 16186T 16189C 16294T 16519C        | 073G 152C 195C 263G 309.1C 309.2C 315.1C            | T  |
| 2342 | F | 18 | Aragon       | 16126C 16294T 16296T 16304C 16519C               | 073G 263G 315.1C                                    | T  |
| 2357 | F | 17 | La Rioja     | 16266T 16304C 16311C                             | 263G 309.1C 315.1C 456T                             | H  |
| 2367 | F | 17 | La Rioja     | 16519C                                           | 263G 309.1C 315.1C                                  | H  |
| 2368 | C | 8  | Navarra CW   | 16240G 16298C                                    | 072C 263G 309.1C 315.1C                             | V  |
| 2372 | C | 8  | Navarra CW   | 16192T 16270T 16319A                             | 073G 150T 263G 315.1C 533G                          | U  |
| 2373 | C | 8  | Navarra CW   | 16298C 16519C                                    | 093G 263G 309.1C 315.1C                             | V  |
| 2375 | C | 8  | Navarra CW   | 16126C 16294T 16296T 16519C                      | 073G 263G 315.1C                                    | T  |
| 2377 | F | 17 | La Rioja     | 16519C                                           | 263G 309.1C 309.2C 315.1C                           | H  |
| 2410 | F | 17 | La Rioja     | 16126C 16362C                                    | 057.1C 064T 150T 263G 309.1C 309.2C 315.1C          | R0 |
| 2412 | F | 17 | La Rioja     | 16172C 16183c 16189C 16219G 16249C 16278T        | 073G 196C 263G 315.1C                               | U  |
| 2424 | D | 10 | Guipuscoa    | 16129A 16519C                                    | 263G 309.1C 309.2C 315.1C 447g                      | H  |
| 2431 | D | 13 | Biscaye      | 16519C                                           | 263G 315.1C                                         | H  |
| 2447 | D | 13 | Biscaye      | 16362C 16482G                                    | 239C 263G 309.1C 315.1C                             | H  |
| 2454 | D | 13 | Biscaye      | 16189C 16192T 16270T 16311C 16336A               | 055a 073G 150T 263G 315.1C                          | U  |
| 2459 | D | 13 | Biscaye      | 16519C                                           | 150T 263G 315.1C                                    | H  |
| 2469 | D | 13 | Biscaye      | 16519C                                           | 263G 315.1C                                         | H  |
| 2501 | D | 11 | Guipuscoa SW | 16161C 16176T 16256T 16270T 16399G               | 073G 189G 263G 315.1C                               | U  |
| 2507 | D | 13 | Biscaye      | 16129A 16519C                                    | 263G 309.1C 309.2C 315.1C                           | H  |
| 2508 | D | 13 | Biscaye      | 16519C                                           | 150T 263G 315.1C                                    | H  |
| 2521 | D | 13 | Biscaye      | 16221C/T 16291T                                  | 263G 315.1C                                         | HV |
| 2526 | D | 13 | Biscaye      | 16291T 16519C                                    | 263G 309.1C 315.1C                                  | H  |
| 2534 | D | 13 | Biscaye      | 16145A 16176g 16223T 16390A 16519C               | 073G 152C 263G 315.1C                               | N1 |
| 2548 | D | 13 | Biscaye      | 16129A 16519C                                    | 263G 309.1C 315.1C                                  | H  |
| 2556 | D | 13 | Biscaye      | 16192T 16270T 16319A                             | 073G 150T 263G 315.1C 533G                          | U  |
| 2560 | D | 10 | Guipuscoa    | 16126C 16519C                                    | 152C 263G 309.1C 315.1C                             | H  |
| 2595 | A | 2  | Bearn        | 16126C 16163G 16186T 16189C 16234T 16294T 16519C | 073G 152C 195C 263G 309.1C 315.1C                   | T  |
| 2604 | A | 2  | Bearn        | 16519C                                           | 263G 315.1C                                         | H  |
| 2605 | A | 2  | Bearn        | 16093C 16224C 16311C 16519C                      | 073G 263G 315.1C 497T                               | K  |

|      |   |    |            |                                           |                                                                        |   |
|------|---|----|------------|-------------------------------------------|------------------------------------------------------------------------|---|
| 2670 | F | 16 | Burgos     | 16069T 16126C 16145A 16231C 16261T        | 073G 150T 152C 195C 215G 263G 295T 309.1C 310.1T 315.1C 319C 489C 513A | J |
| 2671 | F | 16 | Burgos     | 16172C 16219G 16235G 16278T 16294T        | 073G 195C 263G 309.1C 315.1C                                           | U |
| 2674 | F | 16 | Burgos     | 16519C                                    | 263G 309.1C 309.2C 315.1C 515c                                         | H |
| 2679 | C | 8  | Navarra CW | 16192T 16270T 16319A                      | 073G 150T 263G 315.1C 533G                                             | U |
| 2683 | C | 8  | Navarra CW | 16233G                                    | 263G 315.1C 456T                                                       | H |
| 2686 | C | 8  | Navarra CW | 16270T                                    | 073G 150T 263G 315.1C                                                  | U |
| 2705 | C | 8  | Navarra CW | 16519C                                    | 072C 263G 315.1C                                                       | H |
| 2711 | F | 17 | La Rioja   | 16069T 16126C                             | 073G 182T 185A 228A 263G 295T 309.1C 315.1C 462T 482C 489C 522d 523d   | J |
| 2712 | F | 17 | La Rioja   | 16192T 16519C                             | 263G 309.1C 315.1C                                                     | H |
| 2718 | F | 17 | La Rioja   | 16126C 16209C 16294T 16296T 16519C        | 073G 263G 315.1C                                                       | T |
| 2721 | F | 16 | Burgos     | 16240G 16298C                             | 072C 263G 309.1C 315.1C                                                | V |
| 2731 | F | 16 | Burgos     | 16519C                                    | 152C 263G 309.1C 315.1C                                                | H |
| 2732 | F | 16 | Burgos     | 16239T 16311C                             | 073G 150T 263G 315.1C                                                  | U |
| 2733 | C | 8  | Navarra CW | 16075C 16240G 16298C                      | 072C 263G 309.1C 315.1C                                                | V |
| 2751 | C | 8  | Navarra CW | 16181c 16182c 16183c 16189C 16519C        | 073G 146C 153G 263G 315.1C 522d 523d                                   | X |
| 2753 | C | 8  | Navarra CW | 16129A 16519C                             | 263G 309.1C 309.2C 315.1C                                              | H |
| 2758 | C | 8  | Navarra CW | 16176T                                    | 195C 263G 315.1C                                                       | H |
| 2770 | F | 17 | La Rioja   | 16519C                                    | 263G 309.1C 315.1C                                                     | H |
| 2774 | F | 16 | Burgos     | 16261T 16278T 16311C 16519C               | 073G 263G 315.1C 497T                                                  | K |
| 2776 | F | 16 | Burgos     | 16519C                                    | 263G 309.1C 315.1C                                                     | H |
| 2780 | F | 16 | Burgos     | 16320T 16323C 16325C 16519C               | 152C 263G 309.1C 309.2C 315.1C                                         | H |
| 2781 | C | 8  | Navarra CW | 16176T                                    | 195C 263G 315.1C                                                       | H |
| 2782 | C | 8  | Navarra CW | 16192T 16270T 16319A                      | 073G 150T 263G 315.1C 533G                                             | U |
| 2785 | C | 8  | Navarra CW | CRS                                       | 263G 315.1C                                                            | H |
| 2789 | C | 8  | Navarra CW | 16519C                                    | 263G 309.1C 315.1C                                                     | H |
| 2809 | A | 3  | Chalosse   | 16362C 16482G                             | 239C 263G 309.1C 315.1C                                                | H |
| 2810 | A | 3  | Chalosse   | 16069T 16126C 16138c 16519C               | 073G 185A 188G 204C 263G 295T 309.1C 315.1C 462T 489C                  | J |
| 2812 | F | 17 | La Rioja   | 16519C                                    | 263G 315.1C                                                            | H |
| 2813 | F | 16 | Burgos     | 16192T 16270T 16519C                      | 073G 151T 228A 263G 309.1C 315.1C 573.XC                               | U |
| 2832 | F | 16 | Burgos     | 16114T 16126C 16153A 16192T 16294T 16519C | 073G 150T 263G 309.1C 315.1C                                           | T |
| 2841 | F | 16 | Burgos     | 16114a 16126C 16192T 16270T               | 073G 150T 263G 309.1C 315.1C                                           | U |
| 2857 | C | 8  | Navarra CW | 16069T 16126C 16300G                      | 073G 185A 228A 263G 295T 315.1C 462T 489C 522d 523d                    | J |
| 2858 | C | 8  | Navarra CW | 16129A 16316G 16519C                      | 263G 309.1C 309.2C 315.1C                                              | H |
| 2874 | F | 15 | Cantabria  | 16209C 16311C 16519C                      | 263G 315.1C                                                            | H |
| 2878 | F | 15 | Cantabria  | 16069T 16126C 16519C                      | 073G 185A 188G 228A 263G 295T 309.1C 315.1C 462T 489C 573.XC           | J |
| 2907 | B | 4  | Labourdin  | 16519C                                    | 263G 309.1C 315.1C                                                     | H |
| 2911 | B | 4  | Labourdin  | 16298C                                    | 072C 150T 263G 309.1C 315.1C                                           | V |
| 2914 | C | 8  | Navarra CW | 16298C                                    | 072C 150T 263G 309.1C 315.1C                                           | V |
| 2924 | C | 8  | Navarra CW | 16093C 16192T 16270T 16319A               | 073G 150T 263G 315.1C 533G                                             | U |
| 2932 | C | 8  | Navarra CW | 16294T 16519C                             | 152C 263G 315.1C                                                       | H |
| 2934 | C | 8  | Navarra CW | 16093C 16176T                             | 195C 263G 315.1C                                                       | H |
| 2961 | B | 4  | Labourdin  | 16298C                                    | 072C 150T 263G 309.1C 315.1C                                           | V |
| 2968 | B | 4  | Labourdin  | 16519C                                    | 182T 200G 263G 309.1C 315.1C                                           | H |
| 2969 | B | 4  | Labourdin  | 16519C                                    | 263G 315.1C                                                            | H |
| 2977 | C | 8  | Navarra CW | 16291T 16519C                             | 263G 309.1C 315.1C                                                     | H |
| 2982 | F | 18 | Aragon     | 16069T 16126C 16193T 16278T 16368C        | 073G 150T 152C 263G 295T 315.1C 489C                                   | J |

|      |   |    |              |                                                  |                                                                  |    |
|------|---|----|--------------|--------------------------------------------------|------------------------------------------------------------------|----|
| 2983 | F | 18 | Aragon       | 16298C 16311C                                    | 072C 195C 263G 309.1C 315.1C                                     | HV |
| 2986 | F | 18 | Aragon       | 16298C 16311C                                    | 072C 195C 263G 309.1C 315.1C                                     | HV |
| 2990 | B | 6  | Soule        | 16192T 16270T 16319A                             | 073G 150T 263G 315.1C 533G                                       | U  |
| 3057 | A | 1  | Bigorre      | 16224C 16311C 16519C                             | 073G 152C 263G 315.1C 497T 573d                                  | K  |
| 3066 | A | 1  | Bigorre      | 16051G 16129c 16183c 16189C 16362C 16519C        | 073G 152C 217C 263G 309.1C 309.2C 315.1C 340T 508G 523.1C 523.2A | U  |
| 3068 | A | 1  | Bigorre      | 16224C 16519C                                    | 073G 152C 263G 315.1C 497T 523.1C 523.2A                         | K  |
| 3073 | A | 1  | Bigorre      | 16224C 16311C 16519C                             | 073G 263G 315.1C 497T                                            | K  |
| 3090 | F | 15 | Cantabria    | 16220c 16311C 16519C                             | 263G 315.1C                                                      | H  |
| 3108 | F | 18 | Aragon       | 16224C 16311C 16519C                             | 073G 146C 152C 263G 315.1C 498d                                  | K  |
| 3109 | F | 18 | Aragon       | 16069T 16126C 16193T 16278T 16368C               | 073G 150T 152C 263G 295T 315.1C 489C                             | J  |
| 3127 | F | 18 | Aragon       | 16224C 16311C 16519C                             | 073G 146C 152C 263G 315.1C 498d                                  | K  |
| 3137 | F | 18 | Aragon       | 16519C                                           | 182T 200G 263G 309.1C 309.2C 315.1C                              | H  |
| 3194 | F | 16 | Burgos       | 16192T 16270T 16319A 16519C                      | 073G 150T 263G 315.1C 533G                                       | U  |
| 3196 | F | 16 | Burgos       | 16189C 16519C                                    | 152C 263G 315.1C                                                 | H  |
| 3203 | F | 16 | Burgos       | 16519C                                           | 263G 309.1C 315.1C                                               | H  |
| 3207 | F | 18 | Aragon       | 16051G 16129c 16182c 16183c 16189C 16362C 16519C | 073G 152C 217C 263G 309.1C 309.2C 315.1C 340T 508G 523.1C 523.2A | U  |
| 3216 | F | 18 | Aragon       | 16294T 16519C                                    | 146T/C 263G 315.1C                                               | H  |
| 3221 | F | 18 | Aragon       | 16519C                                           | 146C 263G 309.1C 315.1C                                          | H  |
| 3227 | F | 18 | Aragon       | 16104T 16176T 16311C 16519C                      | 263G 315.1C                                                      | H  |
| 3282 | A | 1  | Bigorre      | 16519C                                           | 263G 315.1C                                                      | H  |
| 3286 | C | 8  | Navarra CW   | 16291T 16519C                                    | 152C 263G 315.1C                                                 | H  |
| 3288 | C | 8  | Navarra CW   | 16192T 16256T 16270T 16526A                      | 073G 263G 315.1C                                                 | U  |
| 3289 | C | 8  | Navarra CW   | 16189C 16519C                                    | 152C 195C 263G 315.1C                                            | H  |
| 3322 | F | 18 | Aragon       | 16172C 16189C 16270T 16299G                      | 073G 150T 263G 315.1C                                            | U  |
| 3326 | A | 1  | Bigorre      | 16183c 16189C 16519C                             | 263G 309.1C 315.1C                                               | H  |
| 3328 | A | 1  | Bigorre      | 16519C                                           | 152C 263G 315.1C                                                 | H  |
| 3331 | C | 8  | Navarra CW   | 16126C 16153A 16294T 16519C                      | 041T 073G 150T 263G 309.1C 315.1C                                | T  |
| 3357 | F | 18 | Aragon       | 16069T 16126C 16193T 16278T 16368C               | 073G 150T 152C 263G 295T 315.1C 489C                             | J  |
| 3364 | F | 18 | Aragon       | 16126C 16153A 16294T 16296T 16519C               | 073G 150T 263G 309.1C 315.1C                                     | T  |
| 3375 | F | 18 | Aragon       | 16069T 16126C 16193T 16278T 16368C               | 073G 150T 152C 263G 295T 315.1C 489C                             | J  |
| 3390 | F | 18 | Aragon       | 16069T 16126C 16193T 16278T 16368C               | 073G 150T 152C 263G 295T 315.1C 489C                             | J  |
| 3443 | A | 1  | Bigorre      | 16216G 16298C 16519C                             | 072C 263G 309.1C 315.1C                                          | V  |
| 3445 | A | 1  | Bigorre      | 16216G 16298C 16519C                             | 072C 263G 309.1C 309.2C 315.1C                                   | V  |
| 3447 | A | 1  | Bigorre      | 16192T 16270T 16288C 16319A                      | 073G 150T 263G 315.1C 533G                                       | U  |
| 3451 | A | 1  | Bigorre      | 16216G 16298C 16519C                             | 072C 263G 309.1C 309.2C 315.1C                                   | V  |
| 3488 | C | 8  | Navarra CW   | 16224C 16311C 16519C                             | 073G 263G 309.1C 315.1C 497T                                     | K  |
| 3491 | C | 8  | Navarra CW   | 16176T                                           | 152C 195C 263G 309.1C 315.1C                                     | H  |
| 3514 | C | 8  | Navarra CW   | 16519C                                           | 263G 309.1C 315.1C                                               | H  |
| 3524 | C | 8  | Navarra CW   | 16519C                                           | 093G 263G 309.1C 315.1C                                          | H  |
| 3543 | D | 13 | Biscaye      | 16176T 16256T 16270T 16399G                      | 073G 189G 263G 315.1C                                            | U  |
| 3550 | D | 13 | Biscaye      | 16126C 16519C                                    | 152C 263G 309.1C 315.1C                                          | H  |
| 3553 | D | 13 | Biscaye      | 16051G 16129c 16183c 16189C 16362C 16519C        | 073G 152C 217C 263G 309.1C 309.2C 315.1C 340T 508G               | U  |
| 3556 | D | 11 | Guipuscoa SW | 16086C 16183c 16189C 16263C 16356C 16519C        | 263G 309.1C 309.2C 309.3C 315.1C                                 | H  |
| 3583 | D | 11 | Guipuscoa SW | 16192T 16270T 16319A                             | 073G 150T 263G 315.1C 533G                                       | U  |
| 3600 | D | 11 | Guipuscoa SW | 16129A 16519C                                    | 263G 315.1C 447g                                                 | H  |
| 3611 | D | 11 | Guipuscoa SW | 16192T 16270T 16319A                             | 073G 150T 263G 315.1C 533G                                       | U  |
| 3616 | D | 11 | Guipuscoa SW | 16192T 16270T 16319A                             | 073G 150T 263G 315.1C 533G                                       | U  |



|      |   |    |              |                                                         |                                                                      |    |
|------|---|----|--------------|---------------------------------------------------------|----------------------------------------------------------------------|----|
| 3630 | D | 11 | Guipuscoa SW | 16278T 16311C 16519C                                    | 073G 263G 315.1C 497T                                                | K  |
| 3657 | A | 2  | Bearn        | 16291T 16519C                                           | 263G 309.1C 309.2C 315.1C                                            | H  |
| 3665 | A | 2  | Bearn        | 16176T                                                  | 195C 263G 315.1C                                                     | H  |
| 3669 | A | 2  | Bearn        | 16256T 16270T 16399G                                    | 073G 263G 309.1C 315.1C                                              | U  |
| 3684 | A | 2  | Bearn        | 16093C 16519C                                           | 093G 207A 263G 309.1C 309.2C 315.1C                                  | H  |
| 3724 | A | 3  | Chalosse     | 16298C                                                  | 072C 150T 263G 309.1C 315.1C                                         | V  |
| 3734 | A | 3  | Chalosse     | 16145A 16189C 16192T 16256T 16270T 16399G 16519C        | 073G 195C 263G 309.1C 315.1C 573.XC                                  | U  |
| 3740 | A | 3  | Chalosse     | 16267T 16298C                                           | 072C 195C 263G 309.1C 315.1C                                         | HV |
| 3749 | A | 3  | Chalosse     | 16291T 16304C 16519C                                    | 263G 309.1C 315.1C                                                   | H  |
| 3773 | F | 17 | La Rioja     | 16069T 16126C 16278T 16366T 16519C                      | 073G 150T 185A 188G 228A 263G 295T 309.1C 315.1C 462T 489C 522d 523d | J  |
| 3777 | F | 17 | La Rioja     | 16172C 16183c 16189C 16219G 16239T 16278T 16293G 16362C | 073G 263G 309.1C 315.1C                                              | U  |
| 3778 | F | 17 | La Rioja     | 16356C 16519C                                           | 073G 195C 263G 310C 499A 523.1C 523.2A 523.3C 523.4A                 | U  |
| 3825 | A | 1  | Bigorre      | 16093C 16224C 16311C 16519C                             | 073G 146C 152C 195C 263G 309.1C 315.1C 497T                          | K  |
| 3827 | A | 1  | Bigorre      | 16126C 16294T 16296T 16304C 16519C                      | 073G 263G 309.1C 309.2C 315.1C 458T                                  | T  |
| 3831 | B | 6  | Soule        | 16129A 16311C 16355T 16519C                             | 150T 263G 309.1C 315.1C                                              | H  |
| 3861 | D | 11 | Guipuscoa SW | 16129A 16519C                                           | 263G 309.1C 309.2C 315.1C                                            | H  |
| 3878 | A | 3  | Chalosse     | 16224C 16311C 16354T 16519C                             | 073G 263G 309.1C 309.2C 315.1C 334C 497T 523.1C 523.2A 523.3C 523.4A | K  |
| 3879 | A | 3  | Chalosse     | 16129A 16519C                                           | 263G 309.1C 309.2C 315.1C                                            | H  |
| 3880 | A | 3  | Chalosse     | 16192T 16270T 16319A                                    | 073G 150T 263G 315.1C 533G                                           | U  |
| 3885 | A | 3  | Chalosse     | 16192T 16270T 16319A                                    | 073G 150T 263G 315.1C 533G                                           | U  |
| 3947 | A | 3  | Chalosse     | 16183c 16189C 16311C                                    | 263G 315.1C                                                          | HV |
| 3951 | A | 3  | Chalosse     | 16298C 16390A 16519C                                    | 146C 263G 309.1C 315.1C                                              | V  |
| 3966 | A | 3  | Chalosse     | 16181c 16182c 16183c 16189C 16519C                      | 073G 146C 153G 263G 315.1C 522d 523d                                 | X  |
| 3976 | A | 3  | Chalosse     | 16069T 16126C 16300G                                    | 073G 185A 228A 263G 295T 315.1C 462T 489C 522d 523d                  | J  |
| 4018 | A | 3  | Chalosse     | 16129A 16519C                                           | 263G 309.1C 315.1C                                                   | H  |
| 4019 | B | 6  | Soule        | 16069T 16126C 16193T 16278T 16368C                      | 073G 150T 152C 263G 295T 315.1C 489C                                 | J  |
| 4020 | B | 6  | Soule        | 16093C 16519C                                           | 093G 263G 309.1C 315.1C                                              | H  |
| 4026 | B | 6  | Soule        | 16176T 16224C 16519C                                    | 073G 152C 263G 315.1C 497T 523.1C 523.2A 523.3C 523.4A               | K  |
| 4066 | F | 16 | Burgos       | 16126C 16163G 16186T 16189C 16294T 16519C               | 073G 152C 195C 263G 309.1C 315.1C                                    | T  |
| 4077 | F | 16 | Burgos       | 16192T 16256T 16270T 16399G                             | 073G 263G 315.1C                                                     | U  |
| 4146 | F | 15 | Cantabria    | 16291T 16519C                                           | 263G 309.1C 315.1C 316A                                              | H  |
| 4156 | F | 15 | Cantabria    | 16294T 16304C                                           | 263G 315.1C 456T                                                     | H  |
| 4170 | F | 15 | Cantabria    | 16126C 16163G 16172C 16186T 16189C 16294T 16304C 16519C | 073G 151T 152C 263G 315.1C                                           | T  |
| 4177 | F | 15 | Cantabria    | 16126C 16311C 16519C                                    | 195C 263G 309.1C 309.2C 315.1C 368.1A 368.2G 368.3A 368.4A           | H  |
| 4236 | F | 15 | Cantabria    | 16304C 16519C                                           | 093G 263G 315.1C 456T 513A                                           | H  |
| 4239 | F | 15 | Cantabria    | 16519C                                                  | 152C 263G 315.1C 522d 523d                                           | H  |
| 4249 | F | 15 | Cantabria    | 16192T 16519C                                           | 263G 309.1C 315.1C                                                   | H  |
| 4261 | F | 15 | Cantabria    | 16519C                                                  | 263G 309.1C 315.1C                                                   | H  |
| 4321 | B | 6  | Soule        | 16519C                                                  | 263G 315.1C                                                          | H  |
| 4328 | B | 6  | Soule        | 16240G 16298C                                           | 072C 263G 309.1C 315.1C                                              | V  |
| 4331 | F | 16 | Burgos       | 16519C                                                  | 263G 309.1C 309.2C 315.1C 515c                                       | H  |
| 4343 | F | 16 | Burgos       | 16069T 16126C 16189C                                    | 073G 185A 228A 263G 295T 309.1C 315.1C 462T 482C 489C                | J  |
| 4416 | D | 11 | Guipuscoa SW | 16037G 16189C 16192T 16270T 16311C 16336A               | 055a 073G 150T 263G 309.1C 315.1C                                    | U  |
| 4437 | D | 13 | Biscaye      | 16172C 16294T 16519C                                    | 263G 315.1C 477C                                                     | H  |
| 4439 | D | 13 | Biscaye      | 16217C 16311C 16519C                                    | 152C 263G 315.1C                                                     | H  |
| 4451 | D | 13 | Biscaye      | 16519C                                                  | 093G 151T 263G 315.1C                                                | H  |

|      |   |    |                |                                                  |                                                                    |    |
|------|---|----|----------------|--------------------------------------------------|--------------------------------------------------------------------|----|
| 4454 | D | 13 | Biscaye        | 16519C                                           | 150T 152C 263G 309.1C 315.1C                                       | H  |
| 4455 | D | 13 | Biscaye        | 16069T 16126C 16189C 16278T 16366T 16519C        | 073G 185A 188G 228A 263G 295T 309.1C 315.1C 462T 489C<br>522d 523d | J  |
| 4463 | D | 13 | Biscaye        | 16291T 16519C                                    | 263G 309.1C 315.1C                                                 | H  |
| 4464 | D | 13 | Biscaye        | 16519C                                           | 041T 263G 315.1C                                                   | H  |
| 4465 | D | 13 | Biscaye        | 16129A 16189C 16223T 16261T 16391A 16519C        | NS                                                                 | I  |
| 4487 | D | 13 | Biscaye        | 16069T 16126C 16519C                             | 073G 185A 228A 263G 295T 315.1C 462T 489C                          | J  |
| 4492 | D | 13 | Biscaye        | 16192T 16270T 16319A                             | 073G 150T 263G 315.1C 533G                                         | U  |
| 4496 | D | 13 | Biscaye        | 16291T 16519C                                    | 263G 309.1C 315.1C                                                 | H  |
| 4498 | D | 13 | Biscaye        | 16066G 16362C 16482G                             | 239C 263G 309.1C 315.1C                                            | H  |
| 4501 | D | 13 | Biscaye        | 16342C                                           | 073G 263G 282C 309.1C 315.1C                                       | U  |
| 4526 | D | 13 | Biscaye        | 16051G 16129c 16183c 16189C 16362C 16519C        | 073G 152C 217C 263G 309.1C 315.1C 340T 508G                        | U  |
| 4535 | D | 13 | Biscaye        | 16291T 16519C                                    | 263G 309.1C 315.1C                                                 | H  |
| 4539 | D | 13 | Biscaye        | 16519C                                           | 263G 315.1C                                                        | H  |
| 4541 | D | 13 | Biscaye        | 16037G 16189C 16192T 16270T 16311C 16336A        | 055a 073G 150T 263G 309.1C 315.1C                                  | U  |
| 4548 | D | 13 | Biscaye        | 16291T 16519C                                    | 263G 309.1C 309.2C 315.1C                                          | H  |
| 5281 | B | 4  | Labourdin      | 16192T 16270T 16319A                             | 073G 150T 263G 315.1C 533G                                         | U  |
| 5288 | B | 4  | Labourdin      | 16291T 16519C                                    | 263G 309.1C 315.1C                                                 | H  |
| 5376 | D | 11 | Guipuscoa SW   | 16126C 16292T 16294T 16519C                      | 073G 146C 263G 279C 309.1C 315.1C                                  | T  |
| 5385 | C | 7  | Navarra NE     | 16298C 16527T                                    | 072C 093G 263G 315.1C                                              | V  |
| 5397 | C | 7  | Navarra NE     | 16069T 16093C 16126C 16278T 16366T 16519C        | 073G 185A 188G 228A 263G 295T 315.1C 462T 489C 522d<br>523d        | J  |
| 5414 | C | 7  | Navarra NE     | 16519C                                           | 263G 309.1C 309.2C 315.1C                                          | H  |
| 5425 | C | 7  | Navarra NE     | 16256T 16270T 16399G                             | 073G 152C 263G 309.1C 309.2C 315.1C                                | U  |
| 5427 | C | 7  | Navarra NE     | 16294T 16519C                                    | 263G 309.1C 315.1C                                                 | H  |
| 5430 | D | 11 | Guipuscoa SW   | 16192T 16270T 16319A                             | 073G 150T 263G 315.1C 533G                                         | U  |
| 5432 | C | 8  | Navarra CW     | 16224C 16311C 16519C                             | 073G 152C 263G 315.1C 497T 573d                                    | K  |
| 5441 | C | 8  | Navarra CW     | 16126C 16294T 16296T 16519C                      | 073G 263G 309.1C 315.1C                                            | T  |
| 5442 | B | 5  | Navarra-France | 16519C                                           | 093G 263G 309.1C 315.1C                                            | H  |
| 5443 | B | 5  | Navarra-France | 16217C 16218T 16519C                             | 263G 309.1C 309.2C 315.1C                                          | H  |
| 5447 | B | 6  | Soule          | 16354T                                           | 263G 309.1C 309.2C 315.1C                                          | H  |
| 5452 | C | 12 | Araba          | 16129A 16311C 16519C                             | 263G 309.1C 315.1C                                                 | H  |
| 5464 | C | 12 | Araba          | 16126C 16294T 16296T 16324C 16519C               | 073G 263G 315.1C                                                   | T  |
| 5473 | C | 12 | Araba          | 16298C                                           | 150T 263G 309.1C 315.1C                                            | V  |
| 5486 | C | 12 | Araba          | 16189C 16519C                                    | 152C 263G 315.1C                                                   | H  |
| 5487 | C | 12 | Araba          | 16270T                                           | 073G 150T 263G 309.1C 315.1C 523.1C 523.2A                         | U  |
| 5488 | C | 12 | Araba          | 16126C 16294T 16296T 16519C                      | 073G 263G 309.1C 315.1C                                            | T  |
| 5490 | C | 12 | Araba          | 16145A 16176g 16223T 16390A 16519C               | 073G 152C 263G 315.1C                                              | N1 |
| 5508 | B | 5  | Navarra-France | 16519C                                           | 263G 315.1C                                                        | H  |
| 5532 | B | 5  | Navarra-France | 16356C 16519C                                    | 073G 146C 152C 195C 263G 309.1C 315.1C 499A 523.1C<br>523.2A       | U  |
| 5533 | B | 5  | Navarra-France | 16093C 16519C                                    | 093G 263G 309.1C 315.1C                                            | H  |
| 5534 | C | 12 | Araba          | 16221T 16291T                                    | 152C 207A 263G 309.1C 315.1C                                       | HV |
| 5545 | C | 12 | Araba          | 16183c 16189C 16223T 16278T 16519C               | 073G 153G 195C 225A 226C 263G 315.1C                               | X  |
| 5550 | C | 12 | Araba          | 16145A 16224C 16311C 16519C                      | 073G 146C 152C 263G 309.1C 315.1C 498d                             | K  |
| 5553 | C | 12 | Araba          | 16145A 16172C 16189C 16243C 16256T 16270T 16399G | 073G 195C 263G 309.1C 315.1C 573.XC                                | U  |
| 5565 | B | 6  | Soule          | 16069T 16126C 16193T 16278T 16368C               | 073G 150T 152C 263G 295T 315.1C 489C                               | J  |
| 5572 | B | 5  | Navarra-France | 16519C                                           | 263G 309.1C 315.1C                                                 | H  |
| 5577 | B | 5  | Navarra-France | 16311C 16519C                                    | 263G 315.1C                                                        | H  |

|      |   |    |                |                                           |                                                        |    |
|------|---|----|----------------|-------------------------------------------|--------------------------------------------------------|----|
| 5581 | A | 2  | Bearn          | 16183c 16189C 16223T 16255A 16278T 16519C | 073G 153G 195C 225A 227G 263G 315.1C                   | X  |
| 5582 | A | 2  | Bearn          | 16181c 16182c 16183c 16189C 16519C        | 073G 146C 153G 263G 309.1C 315.1C 522d 523d            | X  |
| 5588 | D | 9  | Navarra NW     | CRS                                       | 263G 315.1C                                            | H  |
| 5596 | D | 9  | Navarra NW     | 16192T 16270T 16319A 16362C               | 073G 150T 263G 309.1C 315.1C 533G                      | U  |
| 5602 | D | 9  | Navarra NW     | 16304C 16519C                             | 093G 263G 315.1C 456T 513A                             | H  |
| 5603 | D | 9  | Navarra NW     | 16176T                                    | 195C 263G 315.1C                                       | H  |
| 5612 | E | 14 | Biscaye W      | 16298C                                    | 072C 195C 263G 315.1C                                  | HV |
| 5619 | E | 14 | Biscaye W      | 16519C                                    | 263G 315.1C 523.1C 523.2A 573.XC                       | H  |
| 5620 | E | 14 | Biscaye W      | 16293G 16519C                             | 263G 315.1C                                            | H  |
| 5621 | C | 7  | Navarra NE     | 16298C 16390A 16519C                      | 263G 309.1C 315.1C                                     | V  |
| 5626 | C | 7  | Navarra NE     | 16192T 16270T 16319A                      | 073G 150T 263G 315.1C 533G                             | U  |
| 5637 | C | 7  | Navarra NE     | 16292T 16319A 16519C                      | 195C 263G 315.1C 522d 523d                             | H  |
| 5649 | D | 11 | Guipuscoa SW   | 16167T 16192T 16270T 16311C 16356C        | 073G 150T 263G 309.1C 315.1C 522d 523d                 | U  |
| 5651 | D | 11 | Guipuscoa SW   | 16129A 16519C                             | 263G 309.1C 315.1C                                     | H  |
| 5654 | D | 11 | Guipuscoa SW   | CRS                                       | 073G 263G 309.1C 315.1C 522d 523d                      | H  |
| 5656 | D | 11 | Guipuscoa SW   | 16519C                                    | 150T 152C 263G 309.1C 315.1C                           | H  |
| 5665 | C | 12 | Araba          | 16320T 16323C 16325C 16519C               | 152C 263G 309.1C 315.1C                                | H  |
| 5679 | C | 12 | Araba          | 16069T 16126T 16278T 16366T 16519C        | 073G 185A 188G 228A 263G 295T 309.1C 315.1C 462T 489C  | J  |
|      |   |    |                |                                           | 522d 523d                                              |    |
| 5682 | D | 10 | Guipuscoa      | 16051G 16129c 16183C 16189C 16362C 16519C | 073G 152C 217C 263G 309.1C 309.2C 315.1C 340T 508G     | U  |
| 5686 | D | 9  | Navarra NW     | 16126C 16294T 16296T 16304C 16519C        | 073G 199C 263G 315.1C                                  | T  |
| 5706 | D | 9  | Navarra NW     | 16519C                                    | 195C 263G 315.1C 522d 523d                             | H  |
| 5708 | D | 9  | Navarra NW     | 16291T 16519C                             | 263G 309.1C 315.1C                                     | H  |
| 5710 | D | 9  | Navarra NW     | 16176T 16294T                             | 195C 263G 309.1C 315.1C                                | H  |
| 5711 | D | 13 | Biscaye        | 16129A 16519C                             | 263G 309.1C 315.1C                                     | H  |
| 5715 | D | 13 | Biscaye        | 16304C 16519C                             | 093G 263G 315.1C 456T 513A                             | H  |
| 5716 | D | 13 | Biscaye        | 16093C 16129A 16266T 16519C               | 315.1C                                                 | H  |
| 5724 | D | 13 | Biscaye        | 16069T 16093C 16126C 16278T 16366T 16519C | 073G 185A 188G 228A 263G 295T 309.1C 315.1C 462T 489C  | J  |
|      |   |    |                |                                           | 522d 523d                                              |    |
| 5727 | B | 4  | Labourdin      | 16069T 16126C 16256T                      | 073G 185A 228A 263G 295T 315.1C 462T 482C 489C         | J  |
| 5739 | B | 4  | Labourdin      | 16069T 16126C 16256T                      | 073G 185A 228A 263G 295T 315.1C 462T 482C 489C         | J  |
| 5745 | C | 12 | Araba          | 16248T 16519C                             | 200G 263G 309.1C 315.1C                                | H  |
| 5754 | C | 12 | Araba          | 16368C 16519C                             | 150T 195C 263G 309.1C 315.1C                           | H  |
| 5755 | C | 12 | Araba          | 16248T 16519C                             | 150T/C 200G 263G 309.1C 315.1C                         | H  |
| 5760 | B | 5  | Navarra-France | 16147T 16356C 16519C                      | 073G 183G 195C 198T 263G 310C 499A                     | U  |
| 5763 | B | 5  | Navarra-France | 16176T                                    | 195C 263G 315.1C                                       | H  |
| 5766 | B | 5  | Navarra-France | 16294T 16311C 16519C                      | 263G 315.1C                                            | H  |
| 5776 | B | 6  | Soule          | 16069T 16126C 16300G                      | 073G 185A 228A 263G 295T 315.1C 462T 489C 522d 523d    | J  |
| 5782 | B | 5  | Navarra-France | 16221T 16291T                             | 263G 309.1C 315.1C                                     | HV |
| 5790 | B | 5  | Navarra-France | 16129A 16519C                             | 263G 315.1C 460C                                       | H  |
| 5793 | C | 12 | Araba          | 16298C                                    | 072C 263G 309.1C 315.1C                                | V  |
| 5803 | C | 12 | Araba          | 16111T 16192T 16256T 16270T 16291T 16399G | 073G 263G 315.1C                                       | U  |
| 5806 | C | 12 | Araba          | 16189C 16519C                             | 263G 309.1C 309.2C 315.1C                              | H  |
| 5808 | B | 6  | Soule          | 16192T 16270T 16319A                      | 073G 150T 263G 315.1C 533G                             | U  |
| 5814 | B | 6  | Soule          | 16224C 16519C                             | 073G 152C 263G 315.1C 497T 523.1C 523.2A 523.3C 523.4A | K  |
| 5823 | B | 6  | Soule          | 16093C 16519C                             | 093G 263G 309.1C 309.2C 315.1C                         | H  |
| 5827 | B | 6  | Soule          | 16224C 16234T 16311C 16519C               | 073G 146C 150T 263G 315.1C                             | K  |
| 5836 | D | 9  | Navarra NW     | CRS                                       | 260G/A 263G 315.1C                                     | H  |
| 5848 | D | 9  | Navarra NW     | 16519C                                    | 150T 263G 315.1C                                       | H  |

|      |   |    |                |                                                  |                                                            |    |
|------|---|----|----------------|--------------------------------------------------|------------------------------------------------------------|----|
| 5881 | D | 9  | Navarra NW     | 16192T 16270T 16319A 16362C                      | 073G 150T 263G 309.1C 315.1C 533G                          | U  |
| 5898 | C | 12 | Araba          | 16069T 16126T 16519C                             | 073G 185A 188G 210G 228A 263G 295T 315.1C 462T 489C        | J  |
| 5903 | C | 12 | Araba          | CRS                                              | 263G 295T 315.1C                                           | H  |
| 5904 | C | 12 | Araba          | 16192T 16311C                                    | 073G 150T 195C 263G 315.1C                                 | U  |
| 5911 | B | 6  | Soule          | 16519C                                           | 150T 263G 315.1C                                           | H  |
| 5913 | B | 6  | Soule          | 16069T 16126C 16185T                             | 073G 228A 263G 295T 309.1C 315.1C 462T 489C                | J  |
| 5915 | B | 6  | Soule          | 16069T 16126C 16300G 16519C                      | 073G 185A 228A 263G 295T 315.1C 462T 489C 522d 523d        | J  |
| 5952 | B | 6  | Soule          | 16172C 16223T 16292T 16320T 16519C               | 073G 119C 189G 195C 204C 207A 263G 309.1C 315.1C 522d 523d | W  |
| 5957 | B | 5  | Navarra-France | 16129A 16519C                                    | 093G 185A 263G 315.1C                                      | H  |
| 5967 | B | 5  | Navarra-France | 16129A 16519C                                    | 093G 185A 263G 315.1C                                      | H  |
| 5969 | B | 6  | Soule          | 16069T 16126C 16193T 16278T 16368C               | 073G 150T 152C 263G 295T 315.1C 489C                       | J  |
| 5974 | C | 12 | Araba          | 16129A 16519C                                    | 263G 309.1C 315.1C                                         | H  |
| 5978 | C | 12 | Araba          | 16221T 16291T                                    | 152C 207A 263G 309.1C 315.1C                               | HV |
| 5979 | C | 12 | Araba          | 16362C 16519C                                    | 263G 315.1C                                                | H  |
| 5987 | D | 9  | Navarra NW     | 16270T                                           | 073G 150T 263G 309.1C 309.2C 315.1C 523.1C 523.2A          | U  |
| 5991 | D | 9  | Navarra NW     | 16172C 16298C 16519C                             | 072C 195C 263G 309.1C 315.1C                               | HV |
| 5992 | D | 9  | Navarra NW     | 16069T 16126C 16148T 16193T 16278T               | 073G 150T 152C 263G 295T 315.1C 489C                       | J  |
| 5995 | D | 9  | Navarra NW     | 16304C 16519C                                    | 093G 263G 315.1C 456T 513A                                 | H  |
| 5997 | B | 6  | Soule          | 16256T 16270T 16399G                             | 073G 263G 309.1C 309.2C 315.1C                             | U  |
| 6004 | B | 6  | Soule          | 16304C 16519C                                    | 093G 263G 309.1C 315.1C 456T 513A                          | H  |
| 6005 | B | 6  | Soule          | 16192T 16270T 16319A                             | 073G 150T 152C 263G 315.1C 533G                            | U  |
| 6006 | C | 12 | Araba          | 16189C 16221T 16291T                             | 263G 309.1C 309.2C 315.1C                                  | HV |
| 6014 | C | 12 | Araba          | 16129A 16189C 16192T 16243C 16270T 16311C 16336A | 055a 073G 150T 263G 309.1C 315.1C                          | U  |
| 6022 | D | 10 | Guipuscoa      | 16311C 16519C                                    | 263G 315.1C                                                | H  |
| 6032 | C | 8  | Navarra CW     | 16519C                                           | 263G 309.1C 315.1C                                         | H  |
| 6035 | C | 8  | Navarra CW     | 16519C                                           | 263G 309.1C 315.1C 522d 523d                               | H  |
| 6057 | C | 8  | Navarra CW     | 16126C 16294T 16296T 16304C 16519C               | 073G 263G 309.1C 315.1C                                    | T  |
| 6059 | C | 8  | Navarra CW     | CRS                                              | 263G 295T 315.1C                                           | H  |
| 6060 | B | 5  | Navarra-France | 16362C 16482G 16519C                             | 150T 239C 263G 315.1C                                      | H  |
| 6071 | B | 5  | Navarra-France | 16176T                                           | 195C 263G 315.1C                                           | H  |
| 6081 | D | 9  | Navarra NW     | 16519C                                           | 263G 309.1C 315.1C 522d 523d                               | H  |
| 6092 | B | 6  | Soule          | 16126C 16294T 16296T 16304C 16355T 16519C        | 073G 263G 309.1C 315.1C                                    | HV |
| 6093 | B | 6  | Soule          | 16179T 16356C 16519C                             | 073G 195C 263G 309.1C 315.1C 499A 523.1C 523.2A            | U  |
| 6107 | B | 6  | Soule          | 16069T 16126C                                    | 073G 185A 188G 228A 263G 295T 315.1C 462T 489C             | J  |
| 6113 | B | 6  | Soule          | 16354T                                           | 263G 309.1C 309.2C 315.1C                                  | H  |
| 6117 | C | 7  | Navarra NE     | 16126C 16294T 16296T 16519C                      | 073G 263G 309.1C 315.1C                                    | T  |
| 6149 | C | 7  | Navarra NE     | 16192T 16270T 16319A                             | 073G 150T 263G 315.1C 533G                                 | U  |
| 6160 | C | 7  | Navarra NE     | 16294T 16519C                                    | 263G 315.1C                                                | H  |
| 6173 | C | 7  | Navarra NE     | 16192T 16270T 16319A                             | 073G 150T 263G 315.1C 533G                                 | U  |
| 6174 | D | 10 | Guipuscoa      | 16519C                                           | 263G 315.1C                                                | H  |
| 6182 | D | 10 | Guipuscoa      | 16129A 16519C                                    | 263G 309.1C 315.1C                                         | H  |
| 6202 | D | 10 | Guipuscoa      | 16192T 16270T 16319A                             | 073G 150T 263G 315.1C 533G                                 | U  |
| 6207 | B | 6  | Soule          | 16311C 16519C                                    | 263G 315.1C                                                | H  |
| 6212 | B | 6  | Soule          | 16354T                                           | 263G 309.1C 309.2C 315.1C                                  | H  |
| 6215 | B | 6  | Soule          | 16519C                                           | 152C 263G 309.1C 309.2C 315.1C 477C                        | H  |
| 6234 | B | 6  | Soule          | 16069T 16126C 16193T 16278T 16368C               | 073G 150T 152C 263G 295T 315.1C 489C                       | J  |
| 6237 | A | 1  | Bigorre        | 16129A 16223T 16391A 16519C                      | NS                                                         | I  |
| 6248 | A | 1  | Bigorre        | 16129A 16146G 16209C 16258c 16342C               | 073G 263G 282C 309.1C 315.1C                               | U  |

|      |   |    |                |                                                  |                                                        |   |
|------|---|----|----------------|--------------------------------------------------|--------------------------------------------------------|---|
| 6264 | A | 1  | Bigorre        | 16136C 16192T 16270T 16319A                      | 073G 150T 263G 315.1C 533G                             | U |
| 6278 | C | 7  | Navarra NE     | 16519C                                           | 152C 182T 200G 263G 309.1C 309.2C 315.1C               | H |
| 6279 | C | 7  | Navarra NE     | 16192T 16270T 16319A                             | 073G 150T 263G 315.1C 533G                             | U |
| 6295 | C | 7  | Navarra NE     | 16111T 16294T 16519C                             | 263G 315.1C                                            | H |
| 6304 | B | 5  | Navarra-France | 16126C 16163G 16186T 16189C 16294T 16519C        | 073G 152C 195C 263G 309.1C 315.1C                      | T |
| 6314 | B | 5  | Navarra-France | 16129A 16519C                                    | 093G 185A 263G 315.1C                                  | H |
| 6315 | B | 5  | Navarra-France | 16129A 16519C                                    | 263G 315.1C                                            | H |
| 6322 | B | 5  | Navarra-France | 16181c 16182c 16183c 16189C 16519C               | 073G 146C 153G 263G 315.1C 522d 523d                   | X |
| 6341 | D | 9  | Navarra NW     | 16192T 16270T 16319A                             | 073G 150T 195C 198T 263G 315.1C 533G                   | U |
| 6349 | D | 9  | Navarra NW     | 16291T 16519C                                    | 263G 309.1C 309.2C 315.1C                              | H |
| 6354 | D | 9  | Navarra NW     | 16189C 16270T                                    | 073G 150T 263G 309.1C 315.1C                           | U |
| 6358 | C | 7  | Navarra NE     | 16192T 16270T 16319A                             | 073G 150T 263G 309.1C 315.1C 533G                      | U |
| 6361 | C | 7  | Navarra NE     | 16192T 16270T 16319A                             | 073G 150T 263G 315.1C 533G                             | U |
| 6366 | C | 7  | Navarra NE     | 16292T 16319A 16519C                             | 195C 263G 315.1C 522d 523d                             | H |
| 6371 | B | 5  | Navarra-France | 16148T 16519C                                    | 263G 309.1C 309.2C 315.1C                              | H |
| 6379 | B | 5  | Navarra-France | 16069T 16126C                                    | 073G 152C 228A 263G 295T 315.1C 462T 482C 489C         | J |
| 6381 | B | 5  | Navarra-France | 16519C                                           | 263G 309.1C 315.1C                                     | H |
| 6394 | B | 5  | Navarra-France | 16240A/G 16298C                                  | 072C 263G 309.1C 315.1C                                | V |
| 6395 | D | 9  | Navarra NW     | 16126C 16294T 16296T 16519C                      | 073G 263G 309.1C 315.1C                                | T |
| 6423 | D | 9  | Navarra NW     | 16192T 16270T 16319A                             | 073G 150T 263G 315.1C 533G                             | U |
| 6440 | D | 9  | Navarra NW     | 16266T 16519C                                    | 263G 315.1C                                            | H |
| 6441 | E | 14 | Biscaye W      | 16224T 16311C 16519C                             | 073G 195C 263G 315.1C 497T 523.1C 523.2A 523.3C 523.4A | K |
| 6446 | E | 14 | Biscaye W      | 16184T                                           | 044.1C 055C 057C 146C 263G 309.1C 309.2C 315.1C        | H |
| 6447 | E | 14 | Biscaye W      | 16184T                                           | 044.1C 055C 057C 146C 263G 309.1C 309.2C 315.1C        | H |
| 6451 | B | 5  | Navarra-France | 16519C                                           | 263G 309.1C 315.1C                                     | H |
| 6460 | B | 5  | Navarra-France | 16192T 16270T 16319A                             | 073G 150T 263G 315.1C 533G                             | U |
| 6462 | B | 5  | Navarra-France | 16519C                                           | 263G 315.1C                                            | H |
| 6466 | B | 5  | Navarra-France | 16069T 16111g 16126C 16145A 16187T 16222T 16261T | 073G 199C 242T 263G 295T 315.1C 462T 489C              | J |
| 6476 | D | 9  | Navarra NW     | 16126C 16294T 16296T 16519C                      | 073G 263G 309.1C 315.1C                                | T |
| 6484 | A | 1  | Bigorre        | 16126C 16223T 16292T 16519C                      | 073G 152C 189G 194T 195C 204C 207A 263G 315.1C         | W |
| 6488 | A | 1  | Bigorre        | 16069T 16126C 16311C                             | 073G 152C 185A 228A 263G 295T 315.1C 462T 482C 489C    | J |
| 6489 | F | 17 | La Rioja       | 16189C 16356C 16362C 16519C                      | 150T 263G 309.1C 309.2C 315.1C 522d 523d               | H |
| 6502 | F | 17 | La Rioja       | 16129A 16519C                                    | 263G 309.1C 309.2C 315.1C                              | H |
| 6505 | F | 17 | La Rioja       | 16189C 16356C 16519C                             | 263G 309.1C 309.2C 315.1C                              | H |
| 6514 | C | 7  | Navarra NE     | 16192T 16270T 16319A                             | 073G 150T 263G 315.1C 533G                             | U |
| 6516 | C | 7  | Navarra NE     | 16192T 16270T 16319A                             | 073G 150T 263G 315.1C 533G                             | U |
| 6517 | C | 7  | Navarra NE     | 16311C 16519C                                    | 263G 315.1C                                            | H |
| 6529 | C | 7  | Navarra NE     | 16192T 16270T 16319A                             | 073G 150T 263G 315.1C 533G                             | U |
| 6531 | D | 11 | Guipuscoa SW   | 16189C 16223T 16278T 16519C                      | 073G 153G 195C 225A 263G 315.1C                        | X |
| 6567 | C | 12 | Araba          | 16069T 16093C 16126T 16193T 16278T 16319A        | 073G 150T 152C 263G 295T 315.1C 489C                   | J |
| 6593 | C | 12 | Araba          | 16188T 16298C                                    | 072C 263G 309.1C 315.1C                                | V |
| 6594 | C | 12 | Araba          | CRS                                              | 263G 315.1C                                            | H |
| 6611 | D | 9  | Navarra NW     | 16291T 16519C                                    | 263G 309.1C 315.1C                                     | H |
| 6616 | D | 9  | Navarra NW     | 16069T 16126C 16300G                             | 073G 185A 228A 263G 295T 315.1C 462T 489C 522d 523d    | J |
| 6617 | D | 9  | Navarra NW     | 16298C                                           | 072C 150T 263G 309.1C 309.2C 315.1C                    | V |
| 6628 | D | 9  | Navarra NW     | 16519C                                           | 073G 263G 315.1C 522d 523d                             | H |
| 6636 | D | 11 | Guipuscoa SW   | 16129A 16519C                                    | 263G 309.1C 309.2C 315.1C                              | H |
| 6639 | D | 11 | Guipuscoa SW   | 16291T 16519C                                    | 263G 309.1C 309.2C 315.1C                              | H |
| 6642 | D | 11 | Guipuscoa SW   | 16066G 16188C/T 16362C 16482G                    | 239C 263G 309.1C 315.1C                                | H |

|      |   |    |                |                                                  |                                                             |    |
|------|---|----|----------------|--------------------------------------------------|-------------------------------------------------------------|----|
| 6648 | C | 12 | Araba          | 16221T 16291T                                    | 263G 309.1C 309.2C 315.1C                                   | HV |
| 6653 | C | 12 | Araba          | 16129A 16519C                                    | 152C 263G 315.1C                                            | H  |
| 6674 | A | 3  | Chalosse       | 16069T 16093C 16126C 16189C 16278T 16366T 16519C | 073G 185A 188G 228A 263G 295T 315.1C 462T 489C 522d<br>523d | J  |
| 6684 | A | 3  | Chalosse       | 16291T 16304C 16519C                             | 146C 263G 309.1C 315.1C                                     | H  |
| 6685 | A | 3  | Chalosse       | 16145A 16189C 16192T 16256T 16270T 16399G 16519C | NS                                                          | U  |
| 6699 | A | 3  | Chalosse       | 16093C 16126C 16163G 16186T 16189C 16294T 16519C | 073G 152C 195C 263G 309.1C 309.2C 315.1C                    | T  |
| 6716 | A | 2  | Bearn          | 16189C 16234T 16317G 16519C                      | 263G 315.1C                                                 | H  |
| 6723 | A | 2  | Bearn          | 16249T/C 16519C                                  | 093G 263G 309.1C 315.1C                                     | H  |
| 6729 | A | 2  | Bearn          | 16192T 16270T 16319A                             | 073G 150T 263G 315.1C 533G                                  | U  |
| 6760 | D | 11 | Guipuscoa SW   | CRS                                              | 263G 315.1C                                                 | H  |
| 6769 | D | 10 | Guipuscoa      | 16183c 16189C 16255A 16278T 16519C               | 073G 153G 195C 225A 227G 263G 315.1C                        | X  |
| 6786 | C | 8  | Navarra CW     | 16519C                                           | 150T 152C 263G 309.1C 315.1C                                | H  |
| 6791 | C | 8  | Navarra CW     | 16189C 16192T 16270T 16319A                      | 073G 150T 263G 315.1C 533G                                  | U  |
| 6801 | C | 8  | Navarra CW     | 16182c 16183c 16189C 16362C 16519C               | 263G 315.1C                                                 | H  |
| 6802 | C | 8  | Navarra CW     | 16129A 16223T 16261T 16391A 16519C               | 073G 152C 199C 204C 207A 250C 263G 309.1C 315.1C<br>573.XC  | I  |
| 6808 | A | 2  | Bearn          | 16145A 16224C 16311C 16519C                      | 073G 263G 309.1C 315.1C 497T 523.1C 523.2A                  | K  |
| 6821 | A | 2  | Bearn          | 16069T 16126C 16278T 16366T 16519C               | 073G 185A 188G 228A 263G 295T 315.1C 462T 489C 522d<br>523d | J  |
| 6830 | C | 8  | Navarra CW     | 16126C 16294T 16296T 16519C                      | 073G 263G 309.1C 315.1C                                     | T  |
| 6836 | C | 7  | Navarra NE     | 16519C                                           | 263G 309.1C 315.1C                                          | H  |
| 6839 | C | 7  | Navarra NE     | 16093C 16224C 16311C 16519C                      | 073G 263G 309.1C 315.1C 497T                                | K  |
| 6842 | D | 9  | Navarra NW     | 16192T 16223T 16256T 16270T 16526A               | 073G 200G 263G 315.1C                                       | U  |
| 6843 | A | 3  | Chalosse       | 16183c 16189C 16223T 16255A 16278T 16356C 16519C | 073G 153G 195C 225A 227G 263G 315.1C                        | X  |
| 6845 | A | 3  | Chalosse       | 16183c 16189C 16223T 16278T 16356C 16519C        | 073G 153G 195C 225A 227G 263G 315.1C                        | X  |
| 6846 | A | 3  | Chalosse       | 16250T 16463G 16519C                             | 152T/C 263G 309.1C 315.1C                                   | H  |
| 6849 | A | 3  | Chalosse       | 16291T 16519C                                    | 263G 309.1C 315.1C                                          | H  |
| 6854 | A | 2  | Bearn          | 16189C 16192T 16234T 16270T 16311C               | 073G 150T 199C 263G 309.1C 315.1C                           | U  |
| 6898 | A | 2  | Bearn          | 16519C                                           | 152C 263G 309.1C 309.2C 315.1C                              | H  |
| 6900 | A | 2  | Bearn          | 16181c 16182c 16183c 16189C 16519C               | 073G 146C 153G 263G 315.1C 522d 523d                        | X  |
| 6902 | A | 2  | Bearn          | 16192T 16270T 16304C                             | 073G 150T 195C 263G 309.1C 315.1C                           | U  |
| 6907 | A | 2  | Bearn          | 16289G 16519C                                    | 263G 309.1C 315.1C                                          | H  |
| 6914 | B | 5  | Navarra-France | 16304C 16519C                                    | 093G 263G 309.1C 309.2C 315.1C 456T 513A                    | H  |
| 6920 | B | 5  | Navarra-France | 16176T                                           | 146T/C 195C 263G 315.1C                                     | H  |
| 6929 | B | 5  | Navarra-France | 16129A 16519C                                    | 093G 185A 263G 315.1C                                       | H  |
| 6930 | B | 5  | Navarra-France | 16298C 16519C                                    | 072C 151T 186T 263G 309.1C 309.2C 315.1C                    | V  |
| 6935 | C | 8  | Navarra CW     | 16192T 16270T 16295T 16319A                      | 073G 150T 263G 315.1C 533G                                  | U  |
| 6936 | C | 8  | Navarra CW     | 16362C 16519C                                    | 263G 315.1C                                                 | H  |
| 6955 | D | 10 | Guipuscoa      | 16093C 16224T 16311C 16519C                      | 073G 263G 309.1C 315.1C 497T                                | K  |
| 6958 | D | 10 | Guipuscoa      | 16183c 16189C 16223T 16255A 16278T 16519C        | 073G 153G 195C 225A 227G 263G 315.1C                        | X  |
| 6962 | D | 10 | Guipuscoa      | 16519C                                           | 263G 309.1C 315.1C 477C                                     | H  |
| 6965 | A | 2  | Bearn          | 16519C                                           | 152C 263G 309.1C 315.1C                                     | H  |
| 6968 | A | 2  | Bearn          | 16192T 16270T 16319A                             | 073G 150T 263G 315.1C 533G                                  | U  |
| 6970 | A | 2  | Bearn          | 16186T 16227G 16342C 16356C 16519C               | 073G 195C 263G 309.1C 315.1C 499A                           | U  |
| 6974 | A | 2  | Bearn          | 16069T 16126C 16278T 16311C                      | 073G 150T 152C 263G 295T 309.1C 309.2C 315.1C 489C          | J  |
| 6978 | D | 11 | Guipuscoa SW   | 16291T 16519C                                    | 263G 309.1C 315.1C                                          | H  |
| 6994 | D | 11 | Guipuscoa SW   | 16176T 16256T 16270T 16399G                      | 073G 189G 263G 315.1C                                       | U  |
| 6995 | D | 11 | Guipuscoa SW   | 16192T 16270T 16319A                             | 073G 150T 263G 315.1C 533G                                  | U  |

|      |   |    |              |                                           |                                                        |    |
|------|---|----|--------------|-------------------------------------------|--------------------------------------------------------|----|
| 7001 | C | 12 | Araba        | 16126T 16294T 16296T 16519C               | 073G 263G 309.1C 309.2C 315.1C                         | T  |
| 7004 | C | 12 | Araba        | 16519C                                    | 263G 309.1C 315.1C                                     | H  |
| 7015 | C | 12 | Araba        | 16519C                                    | 263G 309.1C 315.1C                                     | H  |
| 7039 | D | 9  | Navarra NW   | 16126C 16294T 16296T 16519C               | 073G 263G 309.1C 315.1C                                | T  |
| 7044 | D | 9  | Navarra NW   | 16266T 16519C                             | 263G 315.1C                                            | H  |
| 7045 | D | 9  | Navarra NW   | 16189C 16192T 16270T 16319A               | 073G 150T 263G 315.1C 533G                             | U  |
| 7067 | B | 6  | Soule        | 16176T                                    | 195C 263G 309.1C 315.1C                                | H  |
| 7073 | D | 11 | Guipuscoa SW | 16192T 16270T 16319A                      | 073G 150T 263G 315.1C 533G                             | U  |
| 7081 | D | 11 | Guipuscoa SW | 16129A 16519C                             | 263G 309.1C 315.1C                                     | H  |
| 7082 | D | 11 | Guipuscoa SW | 16187T 16519C                             | 263G 309.1C 309.2C 315.1C 477C                         | H  |
| 7085 | C | 12 | Araba        | 16519C                                    | 263G 309.1C 315.1C                                     | H  |
| 7089 | C | 12 | Araba        | 16311C 16362C 16519C                      | 263G 315.1C                                            | H  |
| 7094 | C | 12 | Araba        | CRS                                       | 263G 315.1C                                            | H  |
| 7095 | D | 9  | Navarra NW   | 16176T                                    | 195C 263G 309.1C 315.1C                                | H  |
| 7096 | D | 9  | Navarra NW   | 16293G 16519C                             | 263G 309.1C 315.1C 522d 523d                           | H  |
| 7100 | D | 9  | Navarra NW   | 16192T 16270T 16319A 16362C               | 073G 150T 263G 309.1C 315.1C 533G                      | U  |
| 7119 | D | 9  | Navarra NW   | 16192T 16270T 16319A                      | 073G 150T 195C 198T 263G 315.1C 533G                   | U  |
| 7144 | E | 14 | Biscaye W    | 16074G 16189C 16270T                      | 073G 150T 195C 263G 315.1C                             | U  |
| 7153 | E | 14 | Biscaye W    | 16129A 16519C                             | 263G 309.1C 315.1C                                     | H  |
| 7158 | F | 17 | La Rioja     | 16129A 16519C                             | 010C 263G 315.1C                                       | H  |
| 7173 | F | 17 | La Rioja     | 16311C                                    | 152C 263G 309.1C 315.1C                                | H  |
| 7179 | F | 17 | La Rioja     | 16224C 16311C 16519C                      | 073G 146C 263G 315.1C 572T                             | K  |
| 7193 | C | 8  | Navarra CW   | 16069T 16126C 16300G                      | 073G 185A 228A 263G 295T 315.1C 462T 489C 522d 523d    | J  |
| 7196 | C | 8  | Navarra CW   | 16129A 16519C                             | 263G 315.1C                                            | H  |
| 7206 | C | 8  | Navarra CW   | 16126C 16294T 16296T 16519C               | 073G 263G 309.1C 315.1C                                | T  |
| 7222 | C | 8  | Navarra CW   | 16298C                                    | 072C 150T 263G 309.1C 315.1C 522d 523d                 | V  |
| 7241 | D | 11 | Guipuscoa SW | 16129A 16154C 16519C                      | 263G 309.1C 309.2C 315.1C 513A                         | H  |
| 7242 | C | 7  | Navarra NE   | 16126C 16163G 16186T 16189C 16294T 16519C | 073G 152C 195C 263G 309.1C 315.1C                      | T  |
| 7250 | C | 12 | Araba        | 16129G/A 16519C                           | 263G 309.1C 315.1C                                     | H  |
| 7265 | C | 12 | Araba        | 16069T 16093C 16126T 16193T 16278T        | 073G 150T 152C 263G 295T 315.1C 489C 496T              | J  |
| 7273 | C | 12 | Araba        | 16129A 16189C 16355T 16356C 16519C        | 263G 315.1C                                            | H  |
| 7276 | D | 9  | Navarra NW   | 16266T 16519C                             | 263G 315.1C                                            | H  |
| 7298 | D | 9  | Navarra NW   | 16266T 16519C                             | 263G 315.1C                                            | H  |
| 7312 | D | 9  | Navarra NW   | 16266T 16519C                             | 263G 315.1C                                            | H  |
| 7318 | D | 9  | Navarra NW   | 16266T 16519C                             | 263G 315.1C                                            | H  |
| 7323 | E | 14 | Biscaye W    | 16298C                                    | 072C 195C 263G 309.1C 315.1C                           | HV |
| 7329 | E | 14 | Biscaye W    | 16311C 16519C                             | 152C 263G 309.1C 315.1C                                | H  |
| 7344 | E | 14 | Biscaye W    | 16129A 16519C                             | 263G 309.1C 315.1C                                     | H  |
| 7347 | D | 11 | Guipuscoa SW | CRS                                       | 263G 315.1C                                            | H  |
| 7349 | D | 11 | Guipuscoa SW | 16129A 16519C                             | 263G 309.1C 309.2C 315.1C                              | H  |
| 7359 | D | 11 | Guipuscoa SW | 16129A 16519C                             | 263G 309.1C 309.2C 315.1C                              | H  |
| 7368 | B | 6  | Soule        | 16224C 16519C                             | 073G 152C 263G 315.1C 497T 523.1C 523.2A 523.3C 523.4A | K  |
| 7383 | B | 6  | Soule        | 16192T 16270T 16319A                      | 073G 150T 263G 315.1C 533G                             | U  |
| 7394 | B | 6  | Soule        | 16311C 16355T 16519C                      | 150T 263G 309.1C 315.1C                                | H  |
| 7400 | B | 6  | Soule        | 16126C 16294T 16296T 16519C               | 073G 263G 315.1C                                       | T  |
| 7402 | A | 2  | Bearn        | 16298C                                    | 072C 263G 309.1C 315.1C                                | V  |
| 7404 | A | 2  | Bearn        | 16168T 16519C                             | 152C 263G 309.1C 309.2C 315.1C 513A                    | H  |
| 7406 | A | 2  | Bearn        | 16069T 16126C 16519C                      | 073G 185A 188G 228A 263G 295T 309.1C 315.1C 462T 489C  | J  |
| 7412 | D | 11 | Guipuscoa SW | 16319A 16362C 16482G                      | 150T 239C 263G 309.1C 309.2C 315.1C                    | H  |

|      |   |    |                |                                                         |                                                                   |   |
|------|---|----|----------------|---------------------------------------------------------|-------------------------------------------------------------------|---|
| 7427 | D | 11 | Guipuscoa SW   | 16069T 16126T 16193T 16234g 16278T                      | 073G 150T 152C 185A 263G 295T 309.1C 315.1C 489C                  | J |
| 7433 | D | 11 | Guipuscoa SW   | 16519C                                                  | 263G 309.1C 309.2C 315.1C                                         | X |
| 7438 | B | 5  | Navarra-France | 16181c 16182c 16183c 16189C 16519C                      | 073G 146C 153G 263G 315.1C 522d 523d                              | H |
| 7450 | B | 5  | Navarra-France | 16126C 16294T 16296T 16304C 16519C                      | 073G 199C 263G 315.1C                                             | T |
| 7454 | B | 5  | Navarra-France | 16129A 16519C                                           | 263G 309.1C 309.2C 315.1C                                         | H |
| 7455 | B | 5  | Navarra-France | 16192T 16270T 16319A                                    | 073G 150T 263G 315.1C 533G                                        | U |
| 7460 | A | 2  | Bearn          | 16192T 16270T 16304C                                    | 073G 150T 195C 263G 309.1C 315.1C                                 | U |
| 7481 | C | 7  | Navarra NE     | 16192T 16270T 16319A                                    | 073G 150T 263G 315.1C 533G                                        | U |
| 7484 | C | 7  | Navarra NE     | 16189C 16192T 16270T                                    | 073G 150T 263G 309.1C 315.1C 523.1C 523.2A                        | U |
| 7502 | D | 10 | Guipuscoa      | 16298C                                                  | 072C 263G 309.1C 315.1C                                           | V |
| 7506 | D | 10 | Guipuscoa      | 16069T 16126T 16300G                                    | 073G 185A 228A 263G 295T 315.1C 462T 489C 522d 523d               | J |
| 7527 | C | 7  | Navarra NE     | CRS                                                     | 150T 263G 315.1C                                                  | H |
| 7532 | C | 7  | Navarra NE     | 16519C                                                  | 263G 309.1C 315.1C                                                | H |
| 7535 | C | 7  | Navarra NE     | 16519C                                                  | 263G 309.1C 315.1C                                                | H |
| 7538 | C | 7  | Navarra NE     | 16256T 16270T 16399G                                    | 073G 152C 263G 309.1C 309.2C 315.1C                               | U |
| 7541 | D | 9  | Navarra NW     | 16368C                                                  | 263G 315.1C                                                       | H |
| 7555 | D | 9  | Navarra NW     | 16069T 16145A 16209C 16231C 16261T                      | 073G 150T 152C 195C 215G 263G 295T 309.1C 315.1C 319C 489C 513A   | J |
| 7569 | D | 9  | Navarra NW     | 16069T 16126C 16300G                                    | 073G 185A 228A 263G 295T 315.1C 462T 489C 522d 523d               | J |
| 7581 | D | 10 | Guipuscoa      | 16192T 16270T 16319A                                    | 073G 150T 263G 315.1C 533G                                        | U |
| 7594 | D | 10 | Guipuscoa      | 16069T 16126T 16145A 16189C 16231C 16261T               | 073G 150T 152C 195C 215G 263G 295T 309.1C 315.1C 319C 489C 513A   | J |
| 7595 | D | 10 | Guipuscoa      | 16192T 16201T 16245T 16256T 16262T 16270T 16362C 16526A | 073G 263G 309.1C 315.1C                                           | U |
| 7596 | C | 7  | Navarra NE     | CRS                                                     | 150T 263G 315.1C                                                  | H |
| 7602 | C | 7  | Navarra NE     | 16519C                                                  | 263G 309.1C 315.1C                                                | H |
| 7607 | C | 7  | Navarra NE     | 16519C                                                  | 263G 315.1C                                                       | H |
| 7625 | C | 7  | Navarra NE     | CRS                                                     | 150T 263G 315.1C                                                  | H |
| 7626 | B | 6  | Soule          | 16240G 16298C                                           | 072C 263G 309.1C 315.1C                                           | V |
| 7629 | B | 6  | Soule          | 16239C/T 16519C                                         | 150T 263G 315.1C                                                  | H |
| 7643 | B | 6  | Soule          | 16172C 16223T 16292T 16320T 16519C                      | 073G 119C 189G 195C 204C 207A 263G 309.1C 309.2C 315.1C 522d 523d | W |
| 7653 | D | 11 | Guipuscoa SW   | 16069T 16126C 16193T 16234g 16278T                      | 073G 150T 152C 185A 263G 295T 309.1C 315.1C 489C                  | J |
| 7654 | D | 11 | Guipuscoa SW   | 16519C                                                  | 150T 263G 315.1C                                                  | H |
| 7664 | D | 11 | Guipuscoa SW   | 16278T 16519C                                           | 146C 263G 309.1C 315.1C 523.1C 523.2A                             | H |
| 7670 | D | 10 | Guipuscoa      | 16311C 16519C                                           | 263G 315.1C                                                       | H |
| 7672 | D | 10 | Guipuscoa      | 16129A 16519C                                           | 263G 309.1C 309.2C 315.1C                                         | H |
| 7677 | D | 10 | Guipuscoa      | 16519C                                                  | 263G 315.1C                                                       | H |
| 7678 | D | 10 | Guipuscoa      | 16176T 16519C                                           | 195C 263G 315.1C                                                  | H |
| 7680 | D | 11 | Guipuscoa SW   | CRS                                                     | 072C 150T 263G 309.1C 315.1C 522d 523d                            | V |
| 7682 | D | 11 | Guipuscoa SW   | 16189C 16356C 16519C                                    | 263G 309.1C 315.1C                                                | H |
| 7683 | D | 11 | Guipuscoa SW   | 16278T 16311C 16519C                                    | 073G 263G 315.1C 497T                                             | K |
| 7686 | D | 11 | Guipuscoa SW   | 16519C                                                  | 150T 263G 315.1C                                                  | H |
| 7690 | D | 11 | Guipuscoa SW   | 16183c 16189C 16356C 16519C                             | 263G 309.1C 309.2C 315.1C                                         | H |
| 7692 | D | 10 | Guipuscoa      | 16129A 16519C                                           | 263G 315.1C                                                       | H |
| 7695 | D | 10 | Guipuscoa      | 16129A 16519C                                           | 263G 315.1C                                                       | H |
| 7697 | D | 10 | Guipuscoa      | 16224C 16311C 16519C                                    | 073G 146C 152C 263G 315.1C                                        | K |
| 7699 | D | 10 | Guipuscoa      | 16129A 16390A 16519C                                    | 263G 309.1C 309.2C 315.1C                                         | H |
| 7701 | B | 4  | Labourdin      | 16519C                                                  | 150T 263G 315.1C                                                  | H |
| 7710 | B | 4  | Labourdin      | 16192T 16270T 16319A                                    | 073G 150T 263G 315.1C 533G                                        | U |



|       |   |    |              |                                           |                                                       |   |
|-------|---|----|--------------|-------------------------------------------|-------------------------------------------------------|---|
| 7711  | B | 4  | Labourdin    | 16192T 16270T 16319A                      | 073G 150T 263G 315.1C 533G                            | U |
| 7735  | D | 11 | Guipuscoa SW | 16069T 16126T 16193T 16234G 16278T        | 073G 150T 152C 185A 263G 295T 309.1C 315.1C 489C      | J |
| 7739  | D | 11 | Guipuscoa SW | 16176T 16256T 16270T 16399G               | 073G 263G 315.1C 522d 523d                            | U |
| 7756  | D | 10 | Guipuscoa    | 16519C                                    | 263G 309.1C 309.2C 315.1C 477C 523.1C 523.2A          | H |
| 7760  | D | 10 | Guipuscoa    | 16126C 16294T 16296T 16519C               | 073G 263G 309.1C 315.1C                               | T |
| 7779  | D | 10 | Guipuscoa    | 16270T                                    | 073G 150T 263G 309.1C 315.1C 499A 523.1C 523.2A       | U |
| 7782  | D | 9  | Navarra NW   | 16192T 16270T 16519C                      | 073G 150T 151T 228A 263G 309.1C 315.1C 573.XC         | U |
| 7789  | D | 9  | Navarra NW   | 16519C                                    | 263G 309.1C 309.2C 315.1C                             | H |
| 7793  | D | 9  | Navarra NW   | 16266T 16519C                             | 263G 315.1C                                           | H |
| 7799  | C | 12 | Araba        | 16224T 16311C 16319A 16463G 16519C        | 073G 152C 199C 263G 309.1C 315.1C 523.1C 523.2A       | K |
| 7814  | C | 12 | Araba        | 16129A 16189C 16356C 16519C               | 263G 315.1C 316G/A                                    | H |
| 7816  | D | 10 | Guipuscoa    | 16069T 16126C 16278T 16366T 16519C        | 073G 185A 188G 228A 263G 295T 309.1C 315.1C 462T 489C | J |
|       |   |    |              |                                           | 522d 523d                                             |   |
| 7819  | D | 10 | Guipuscoa    | 16126C 16294T 16304C 16519C               | 073G 263G 309.1C 315.1C                               | T |
| 7822  | D | 10 | Guipuscoa    | 16278T 16519C                             | 146C 263G 309.1C 309.2C 315.1C                        | H |
| 7823  | D | 10 | Guipuscoa    | 16192T 16270T 16519C                      | 073G 150T 151T 228A 263G 315.1C                       | U |
| 7842  | D | 10 | Guipuscoa    | 16519C                                    | 150T 263G 309.1C 315.1C                               | H |
| 7871  | B | 6  | Soule        | 16093C 16519C                             | 093G 263G 309.1C 315.1C                               | H |
| 7878  | B | 6  | Soule        | 16256T 16519C                             | 263G 315.1C                                           | H |
| 7897  | B | 6  | Soule        | 16192T 16270T 16304C                      | 073G 150T 195C 263G 309.1C 309.2C 315.1C              | U |
| 7909  | B | 4  | Labourdin    | 16192T 16270T 16319A                      | 073G 150T 263G 315.1C 533G                            | U |
| 7919  | B | 4  | Labourdin    | 16192T 16270T 16319A                      | 073G 150T 263G 315.1C 533G                            | U |
| 7923  | B | 4  | Labourdin    | 16192T 16270T 16319A                      | 073G 150T 263G 315.1C 533G                            | U |
| 7927  | A | 2  | Bearn        | CRS                                       | 073G 263G 282C 309.1C 315.1C                          | U |
| 7930  | A | 2  | Bearn        | 16069T 16126C 16300G                      | 073G 185A 228A 263G 295T 315.1C 462T 489C 522d 523d   | J |
| 79317 | A | 2  | Bearn        | 16192T 16519C                             | 263G 309.1C 315.1C                                    | H |
| 932   |   |    |              |                                           |                                                       |   |
| 7936  | A | 2  | Bearn        | 16224C 16311C 16519C                      | 073G 263G 309.1C 309.2C 315.1C 497T                   | K |
| 7939  | B | 4  | Labourdin    | 16069T 16126C 16300G                      | 073G 185A 228A 263G 295T 315.1C 462T 489C 522d 523d   | J |
| 7943  | B | 4  | Labourdin    | 16356C 16362C 16482G                      | 060C 152C 239C 263G 309.1C 315.1C                     | H |
| 7953  | B | 4  | Labourdin    | 16291T 16519C                             | 263G 309.1C 315.1C                                    | H |
| 7954  | A | 2  | Bearn        | 16192T 16270T 16319A                      | 073G 150T 263G 315.1C 533G                            | U |
| 7964  | A | 2  | Bearn        | 16074G 16153A 16189C 16270T               | 073G 150T 195C 263G 315.1C                            | U |
| 7967  | C | 7  | Navarra NE   | 16298C 16390A 16519C                      | 198T 263G 309.1C 315.1C                               | V |
| 7969  | C | 7  | Navarra NE   | 16192T 16270T 16319A                      | 073G 150T 263G 315.1C 533G                            | U |
| 7977  | C | 7  | Navarra NE   | 16298C 16390A 16519C                      | 198T 263G 309.1C 315.1C                               | V |
| 7995  | C | 7  | Navarra NE   | 16093C 16224C 16311C 16519C               | 073G 263G 315.1C 497T                                 | K |
| 7999  | C | 7  | Navarra NE   | 16126C 16153A 16294T 16296T 16519C        | 073G 150T 263G 309.1C 309.2C 315.1C                   | T |
| 8003  | C | 7  | Navarra NE   | 16192T 16270T 16319A                      | 073G 150T 263G 315.1C 533G                            | U |
| 8006  | C | 7  | Navarra NE   | 16093C 16519C                             | 182T 263G 309.1C 315.1C                               | H |
| 8015  | D | 9  | Navarra NW   | 16069T 16093C 16126C 16278T 16366T 16519C | 073G 185A 188G 228A 263G 295T 315.1C 462T 489C 522d   | J |
|       |   |    |              |                                           | 523d                                                  |   |
| 8024  | D | 9  | Navarra NW   | 16176T                                    | 195C 263G 309.1C 315.1C                               | H |
| 8038  | D | 9  | Navarra NW   | 16192T 16270T 16319A                      | 073G 150T 263G 315.1C 533G                            | U |
| 8040  | B | 4  | Labourdin    | 16192T 16270T 16319A                      | 073G 150T 263G 315.1C 533G                            | U |
| 8043  | B | 4  | Labourdin    | 16126C 16294T 16296T 16519C               | 073G 263G 309.1C 315.1C                               | T |
| 8061  | B | 4  | Labourdin    | 16129A 16519C                             | 263G 309.1C 309.2C 315.1C                             | H |
| 8069  | B | 4  | Labourdin    | 16192T 16270T 16319A                      | 073G 150T 263G 315.1C 533G                            | U |
| 8076  | D | 10 | Guipuscoa    | 16189C 16356C 16519C                      | 263G 309.1C 315.1C                                    | H |

|      |   |    |                |                                           |                                                       |    |
|------|---|----|----------------|-------------------------------------------|-------------------------------------------------------|----|
| 8077 | D | 10 | Guipuscoa      | 16192T 16270T 16319A                      | 073G 150T 263G 315.1C 533G                            | U  |
| 8085 | D | 10 | Guipuscoa      | 16519C                                    | 263G 315.1C                                           | H  |
| 8122 | D | 11 | Guipuscoa SW   | 16519C                                    | 150T 263G 315.1C                                      | H  |
| 8125 | D | 11 | Guipuscoa SW   | 16291T 16519C                             | 263G 309.1C 315.1C                                    | H  |
| 8132 | D | 11 | Guipuscoa SW   | 16342C                                    | 073G 263G 282C 309.1C 315.1C                          | U  |
| 8140 | B | 4  | Labourdin      | 16176T                                    | 195C 263G 315.1C                                      | H  |
| 8142 | B | 4  | Labourdin      | CRS                                       | 073G 263G 309.1C 315.1C 522d 523d                     | H  |
| 8180 | B | 4  | Labourdin      | 16298C                                    | 072C 150T 263G 309.1C 309.2C 315.1C                   | V  |
| 8217 | D | 11 | Guipuscoa SW   | 16519C                                    | 263G 315.1C                                           | H  |
| 8218 | D | 11 | Guipuscoa SW   | 16129A 16519C                             | 152C 263G 309.1C 315.1C                               | H  |
| 8223 | D | 11 | Guipuscoa SW   | 16519C                                    | 263G 309.1C 315.1C                                    | H  |
| 8224 | C | 12 | Araba          | 16129A 16519C                             | 263G 309.1C 315.1C                                    | H  |
| 8230 | C | 12 | Araba          | 16129A 16519C                             | 152C 263G 315.1C                                      | H  |
| 8255 | B | 4  | Labourdin      | 16304C                                    | 263G 309.1C 309.2C 315.1C 456T 526A 573.XC            | H  |
| 8256 | B | 5  | Navarra-France | 16298C 16311C                             | 072C 195C 263G 309.1C 315.1C                          | HV |
| 8257 | B | 5  | Navarra-France | 16519C                                    | 263G 309.1C 315.1C                                    | H  |
| 8260 | B | 5  | Navarra-France | 16181c 16182c 16183c 16189C 16519C        | 073G 146C 153G 263G 315.1C 522d 523d                  | X  |
| 8272 | B | 5  | Navarra-France | 16356C 16519C                             | 073G 146C 152C 195C 263G 309.1C 309.2C 315.1C 499A    | U  |
|      |   |    |                |                                           | 523.1C 523.2A                                         |    |
| 8273 | D | 11 | Guipuscoa SW   | 16129A 16519C                             | 234A/G 263G 309.1C 309.2C 315.1C                      | H  |
| 8274 | D | 11 | Guipuscoa SW   | 16298C 16311C                             | 072C 150T 263G 309.1C 315.1C                          | V  |
| 8281 | D | 11 | Guipuscoa SW   | 16129A 16154C 16248T 16519C               | 263G 309.1C 309.2C 315.1C                             | H  |
| 8315 | D | 13 | Biscaye        | 16051G 16069T 16126C 16278T 16519C        | 073G 185A 188G 228A 263G 295T 309.1C 315.1C 462T 489C | J  |
|      |   |    |                |                                           | 522d 523d                                             |    |
| 8318 | D | 13 | Biscaye        | 16069T 16126C 16145A 16231C 16261T 16399G | 073G 150T 152C 195C 215G 263G 295T 309.1C 315.1C 319C | J  |
|      |   |    |                |                                           | 489C 513A                                             |    |
| 8351 | D | 13 | Biscaye        | 16298T 16311C                             | 072C 263G 315.1C                                      | HV |
| 8359 | D | 13 | Biscaye        | 16129A 16519C                             | 263G 309.1C 315.1C                                    | H  |
| 8366 | D | 13 | Biscaye        | 16519C                                    | 263G 315.1C 444G                                      | H  |
| 8378 | D | 13 | Biscaye        | 16069T 16126C 16300G                      | 073G 185A 228A 263G 295T 315.1C 462T 489C 522d 523d   | J  |
| 8380 | D | 13 | Biscaye        | 16051G 16162G 16519C                      | 073G 263G 315.1C                                      | H  |
| 8382 | D | 10 | Guipuscoa      | 16270T                                    | 073G 150T 263G 309.1C 315.1C 523.1C 523.2A            | U  |
| 8424 | D | 13 | Biscaye        | 16224C 16311C 16519C                      | 073G 152C 263G 315.1C 497T                            | K  |
| 8429 | A | 2  | Bearn          | 16356C 16519C                             | 073G 195C 263G 310C 499A                              | U  |
| 8430 | A | 2  | Bearn          | 16224C 16311C 16519C                      | 073G 146C 152C 263G 315.1C                            | K  |
| 8432 | A | 2  | Bearn          | 16172C 16519C                             | 195C 263G 315.1C 573.XC                               | H  |
| 8437 | B | 5  | Navarra-France | 16298C                                    | 072C 195C 263G 309.1C 315.1C                          | HV |
| 8443 | B | 5  | Navarra-France | 16304C 16519C                             | 093G 263G 309.1C 315.1C 456T 513A 522d 523d           | H  |
| 8445 | B | 5  | Navarra-France | 16129A 16519C                             | 263G 309.1C 315.1C                                    | H  |
| 8459 | B | 5  | Navarra-France | 16240G 16298C                             | 072C 263G 315.1C                                      | V  |
| 8462 | B | 5  | Navarra-France | 16181c 16182c 16183c 16189C 16519C        | 073G 146C 153G 263G 315.1C 522d 523d                  | X  |
| 8463 | B | 5  | Navarra-France | 16069T 16126C 16300G                      | 073G 185A 228A 263G 295T 315.1C 462T 489C 522d 523d   | J  |
| 8469 | B | 5  | Navarra-France | 16069T 16126C 16256T                      | 073G 151T 185A 228A 263G 295T 315.1C 462T 482C 489C   | J  |
|      |   |    |                |                                           | 522d 523d                                             |    |
| 8475 | D | 10 | Guipuscoa      | 16519C                                    | 263G 309.1C 309.2C 315.1C 477C                        | H  |
| 8483 | D | 10 | Guipuscoa      | 16298C                                    | 072C 263G 309.1C 315.1C                               | V  |
| 8495 | D | 10 | Guipuscoa      | 16192T 16270T 16319A                      | 073G 150T 263G 315.1C 533G                            | U  |
| 8497 | C | 7  | Navarra NE     | 16294T 16519C                             | 263G 309.1C 315.1C                                    | H  |
| 8499 | C | 7  | Navarra NE     | 16519C                                    | 093G 263G 309.1C 309.2C 315.1C                        | H  |

|      |   |    |                |                                                  |                                                                    |    |
|------|---|----|----------------|--------------------------------------------------|--------------------------------------------------------------------|----|
| 8505 | C | 7  | Navarra NE     | 16093C 16224C 16311C 16519C                      | 073G 263G 309.1C 315.1C 497T                                       | K  |
| 8519 | C | 7  | Navarra NE     | 16126C 16294T 16296T 16519C                      | 073G 263G 309.1C 315.1C                                            | T  |
| 8521 | D | 11 | Guipuscoa SW   | 16126T 16294T 16296T 16519C                      | 064T 073G 263G 309.1C 315.1C                                       | T  |
| 8527 | D | 11 | Guipuscoa SW   | 16167T 16192T 16270T 16311C 16356C               | 073G 111A/G 150T 263G 309.1C 315.1C 522d 523d                      | U  |
| 8548 | B | 4  | Labourdin      | 16519C                                           | 150T 263G 315.1C                                                   | H  |
| 8568 | B | 4  | Labourdin      | 16293G 16519C                                    | 263G 309.1C 315.1C 522d 523d                                       | H  |
| 8582 | A | 2  | Bearn          | 16162G 16519C                                    | 073G 152C 263G 309.1C 315.1C                                       | H  |
| 8603 | A | 2  | Bearn          | 16298C 16390A 16519C                             | 263G 309.1C 315.1C                                                 | V  |
| 8612 | B | 4  | Labourdin      | 16124T/C 16298C 16465T                           | 072C 150T 263G 309.1C 315.1C                                       | V  |
| 8621 | B | 5  | Navarra-France | 16221T 16291T                                    | 263G 309.1C 315.1C                                                 | HV |
| 8625 | B | 4  | Labourdin      | 16298C 16390A 16519C                             | 263G 309.1C 315.1C                                                 | V  |
| 8630 | D | 9  | Navarra NW     | 16172C 16270T                                    | 073G 150T 263G 315.1C                                              | U  |
| 8641 | C | 8  | Navarra CW     | 16126C 16294T 16296T 16519C                      | 073G 263G 309.1C 315.1C                                            | T  |
| 8643 | C | 8  | Navarra CW     | 16519C                                           | 263G 309.1C 315.1C 522d 523d                                       | H  |
| 8660 | B | 4  | Labourdin      | 16129A 16519C                                    | 263G 309.1C 309.2C 315.1C                                          | H  |
| 8670 | B | 4  | Labourdin      | 16069T 16093C 16126C 16278T 16366T 16368C 16519C | 073G 185A 188G 228A 263G 295T 309.1C 315.1C 462T 489C<br>522d 523d | J  |
| 8678 | B | 4  | Labourdin      | 16519C                                           | 093G 263G 309.1C 315.1C                                            | H  |
| 8681 | D | 10 | Guipuscoa      | 16189C 16356C 16519C                             | 263G 309.1C 315.1C                                                 | H  |
| 8683 | D | 10 | Guipuscoa      | 16298C 16320T                                    | 072C 150T 200G 263G 309.1C 315.1C                                  | V  |
| 8685 | A | 3  | Chalosse       | 16192T 16270T 16319A                             | 073G 150T 263G 315.1C 533G                                         | U  |
| 8686 | A | 3  | Chalosse       | 16192T 16270T 16319A                             | 073G 150T 263G 315.1C 533G                                         | U  |
| 8687 | A | 3  | Chalosse       | 16288C 16311C 16362C                             | 114T 146C 195C 263G 315.1C                                         | H  |
| 8707 | B | 4  | Labourdin      | 16129A 16519C                                    | 263G 309.1C 309.2C 315.1C                                          | H  |
| 8718 | B | 4  | Labourdin      | 16192T 16270T 16319A                             | 073G 150T 263G 315.1C 533G                                         | U  |
| 8726 | B | 4  | Labourdin      | 16519C                                           | 263G 315.1C                                                        | H  |
| 8728 | B | 4  | Labourdin      | 16278T 16311C 16519C                             | 073G 263G 315.1C 497T                                              | K  |
| 8729 | B | 4  | Labourdin      | 16298C 16390A 16519C                             | 263G 309.1C 315.1C                                                 | V  |
| 8742 | B | 5  | Navarra-France | 16093C 16172C 16183c 16189C 16219G 16278T        | 073G 185A 263G 315.1C                                              | U  |
| 8748 | B | 5  | Navarra-France | 16192T 16270T 16319A                             | 073G 150T 263G 315.1C 533G                                         | U  |
| 8751 | D | 10 | Guipuscoa      | 16192T 16270T 16319A                             | 073G 150T 263G 309.1C 315.1C 533G                                  | U  |
| 8757 | D | 10 | Guipuscoa      | 16519C                                           | 263G 309.1C 309.2C 315.1C                                          | H  |
| 8762 | B | 6  | Soule          | 16224C 16311C 16519C                             | 073G 146C 152C 263G 315.1C 498d                                    | K  |
| 8764 | B | 6  | Soule          | 16183c 16189C 16223T 16255A 16278T 16519C        | 073G 153G 195C 225A 227G 263G 315.1C                               | X  |
| 8765 | B | 6  | Soule          | 16258c 16298C                                    | 072C 195C 263G 315.1C                                              | HV |
| 8776 | B | 6  | Soule          | 16311C 16519C                                    | 263G 315.1C                                                        | H  |
| 8793 | C | 12 | Araba          | 16129A 16189C 16356C 16519C                      | 263G 315.1C                                                        | H  |
| 8798 | C | 12 | Araba          | 16129A 16519C                                    | 152C 263G 315.1C                                                   | H  |
| 8806 | B | 5  | Navarra-France | 16362C 16519C                                    | 263G 309.1C 315.1C                                                 | H  |
| 8819 | B | 5  | Navarra-France | 16519C                                           | 263G 309.1C 315.1C                                                 | H  |
| 8821 | B | 5  | Navarra-France | 16192T 16270T 16319A                             | 073G 150T 263G 315.1C 533G                                         | U  |
| 8823 | A | 1  | Bigorre        | 16093C 16519C                                    | 093G 263G 309.1C 315.1C                                            | H  |
| 8825 | A | 1  | Bigorre        | 16145A 16172C 16189C 16243C 16256T 16270T 16399G | 073G 195C 263G 309.1C 315.1C 573.XC                                | U  |
| 8842 | A | 1  | Bigorre        | 16362C 16482G                                    | 152C 239C 263G 309.1C 315.1C                                       | H  |
| 8843 | A | 1  | Bigorre        | 16519C                                           | 263G 315.1C                                                        | H  |
| 8846 | A | 2  | Bearn          | 16519C                                           | 152C 263G 315.1C                                                   | H  |
| 8850 | A | 2  | Bearn          | 16286T 16519C                                    | 152C 263G 315.1C                                                   | H  |
| 8852 | A | 2  | Bearn          | 16126C 16294T 16296T 16304C 16355T 16519C        | 073G 263G 315.1C                                                   | T  |
| 8854 | F | 16 | Burgos         | 16224C 16234T 16311C 16519C                      | 073G 146C 150T 263G 315.1C                                         | K  |

|      |   |    |                |                                                           |                                                            |    |
|------|---|----|----------------|-----------------------------------------------------------|------------------------------------------------------------|----|
| 8860 | C | 7  | Navarra NE     | 16298C                                                    | 072C 263G 309.1C 309.2C 315.1C                             | V  |
| 8872 | A | 1  | Bigorre        | 16176T 16219G 16519C                                      | 146C 257G 263G 309.1C 315.1C 477C                          | H  |
| 8876 | A | 1  | Bigorre        | 16051G 16092C 16129c 16183c 16193.1C 16311C 16362C 16519C | 073G 152C 199C 217C 263G 309.1C 309.2C 315.1C 508G         | U  |
| 8886 | A | 1  | Bigorre        | 16051G 16092C 16129c 16183c 16193.1C 16311C 16362C 16519C | 073G 152C 199C 217C 263G 309.1C 309.2C 315.1C 508G         | U  |
| 8906 | A | 2  | Bearn          | 16224C 16234T 16311C 16519C                               | 073G 146C 150T 263G 315.1C                                 | K  |
| 8907 | A | 2  | Bearn          | 16298C                                                    | 072C 195C 263G 309.1C 315.1C 523.1C 523.2A                 | HV |
| 8913 | A | 2  | Bearn          | 16354T                                                    | 263G 309.1C 309.2C 315.1C 575T                             | H  |
| 8948 | C | 7  | Navarra NE     | 16519C                                                    | 263G 315.1C                                                | H  |
| 8950 | D | 10 | Guipuscoa      | 16093C 16129A 16519C                                      | 263G 309.1C 315.1C                                         | H  |
| 8959 | D | 10 | Guipuscoa      | 16291T 16519C                                             | 263G 309.1C 315.1C                                         | H  |
| 8971 | B | 6  | Soule          | 16192T 16270T 16319A                                      | 073G 150T 263G 315.1C 533G                                 | U  |
| 8987 | B | 6  | Soule          | 16192T 16270T 16319A                                      | 073G 150T 263G 315.1C 533G                                 | U  |
| 9002 | B | 6  | Soule          | 16069T 16126C 16193T 16278T 16368C                        | 073G 150T 152C 263G 295T 315.1C 489C                       | J  |
| 9026 | D | 9  | Navarra NW     | 16192T 16223T 16325C 16519C                               | 073G 152C 189G 194T 195C 204C 207A 263G 309.1C 315.1C      | W  |
| 9028 | D | 9  | Navarra NW     | 16304C 16519C                                             | 093G 263G 315.1C 456T 513A                                 | H  |
| 9029 | D | 9  | Navarra NW     | 16192T 16270T 16319A 16362C                               | 073G 150T 263G 309.1C 315.1C 533G                          | U  |
| 9044 | D | 10 | Guipuscoa      | 16129A 16519C                                             | 263G 309.1C 315.1C                                         | H  |
| 9075 | B | 4  | Labourdin      | 16129A 16519C                                             | 263G 309.1C 315.1C                                         | H  |
| 9076 | B | 4  | Labourdin      | 16126C 16294T 16304C 16519C                               | 073G 263G 309.1C 315.1C                                    | T  |
| 9082 | B | 4  | Labourdin      | 16298C 16390A 16519C                                      | 263G 309.1C 309.2C 315.1C                                  | V  |
| 9087 | B | 4  | Labourdin      | 16069T 16126C 16148T 16193T 16278T                        | 073G 150T 152C 263G 295T 315.1C 489C                       | J  |
| 9088 | C | 12 | Araba          | 16126C 16163G 16186T 16189C 16294T 16519C                 | 064T 073G 152C 195C 263G 309.1C 309.2C 315.1C              | T  |
| 9095 | C | 12 | Araba          | 16227G 16256T 16270T 16316G 16320T 16399G 16504A          | 073G 152C 263G 309.1C 315.1C 523.1C 523.2A                 | U  |
| 9100 | C | 12 | Araba          | 16172C 16311C                                             | 263G 315.1C                                                | HV |
| 9103 | B | 5  | Navarra-France | 16298C                                                    | 072C 195C 263G 309.1C 315.1C                               | HV |
| 9114 | B | 5  | Navarra-France | 16176T 16311C                                             | 195C 263G 315.1C                                           | H  |
| 9121 | D | 11 | Guipuscoa SW   | CRS                                                       | 072C 150T 263G 309.1C 315.1C                               | V  |
| 9123 | D | 11 | Guipuscoa SW   | 16519C                                                    | 263G 309.1C 309.2C 315.1C                                  | H  |
| 9127 | D | 11 | Guipuscoa SW   | 16311C 16519C                                             | 263G 315.1C                                                | H  |
| 9132 | D | 11 | Guipuscoa SW   | 16176T 16256T 16270T 16399G                               | 073G 189G 263G 315.1C                                      | U  |
| 9155 | D | 10 | Guipuscoa      | 16069T 16126C 16300G                                      | 073G 185A 228A 263G 295T 309.1C 315.1C 462T 489C 522d 523d | J  |
| 9182 | D | 10 | Guipuscoa      | 16519C                                                    | 263G 315.1C                                                | H  |
| 9185 | D | 10 | Guipuscoa      | 16176T                                                    | 195C 263G 315.1C                                           | H  |
| 9192 | B | 5  | Navarra-France | 16240G 16298C                                             | 072C 263G 309.1C 315.1C                                    | V  |
| 9193 | B | 5  | Navarra-France | 16093C 16172C 16224C 16311C 16519C                        | 073G 114T 152C 263G 315.1C 497T                            | K  |
| 9205 | B | 5  | Navarra-France | 16145A 16189C 16192T 16256T 16270T 16399G 16519C          | 073G 195C 263G 309.1C 315.1C 573.XC                        | U  |
| 9211 | D | 10 | Guipuscoa      | 16519C                                                    | 150T 263G 315.1C                                           | H  |
| 9220 | D | 10 | Guipuscoa      | 16069T 16126T 16300G                                      | 073G 185A 228A 263G 295T 315.1C 462T 489C 522d 523d        | J  |
| 9222 | D | 10 | Guipuscoa      | 16192T 16261T 16270T 16319A                               | 073G 150T 263G 315.1C 533G                                 | U  |
| 9231 | D | 10 | Guipuscoa      | 16192T 16223T 16325C 16519C                               | 073G 152C 189G 194T 195C 204C 207A 263G 309.1C 315.1C      | W  |
| 9236 | D | 10 | Guipuscoa      | 16129A 16519C                                             | 263G 315.1C 447g                                           | H  |
| 9244 | D | 10 | Guipuscoa      | 16519C                                                    | 263G 315.1C                                                | H  |
| 9264 | C | 12 | Araba          | 16192T 16270T 16319A                                      | 073G 150T 263G 315.1C 513A 533G                            | U  |
| 9271 | B | 5  | Navarra-France | 16129A 16519C                                             | 263G 309.1C 309.2C 315.1C                                  | H  |
| 9275 | B | 5  | Navarra-France | 16186T 16342C 16356C 16519C                               | 073G 195C 263G 315.1C 499A                                 | U  |
| 9282 | B | 5  | Navarra-France | 16129A 16519C                                             | 093G 185A 263G 315.1C                                      | H  |
| 9305 | B | 4  | Labourdin      | CRS                                                       | 073G 263G 315.1C 522d 523d                                 | H  |
| 9316 | B | 4  | Labourdin      | 16192T 16270T 16319A                                      | 073G 150T 263G 315.1C 533G                                 | U  |

|      |   |    |                |                                           |                                                                 |      |
|------|---|----|----------------|-------------------------------------------|-----------------------------------------------------------------|------|
| 9317 | B | 4  | Labourdin      | 16069T 16126C 16278T 16366T 16519C        | 073G 185A 188G 228A 263G 295T 309.1C 315.1C 462T 489C 522d 523d | J    |
| 9319 | B | 4  | Labourdin      | 16519C                                    | 182T 200G 263G 309.1C 309.2C 315.1C                             | H    |
| 9333 | B | 4  | Labourdin      | 16519C                                    | 263G 309.1C 315.1C                                              | H    |
| 9335 | B | 4  | Labourdin      | 16298C                                    | 072C 263G 309.1C 315.1C                                         | V    |
| 9347 | B | 5  | Navarra-France | 16147T 16356C 16519C                      | 073G 183G 195C 263G 310C 499A                                   | U    |
| 9350 | B | 5  | Navarra-France | 16069T 16126C 16300G                      | 073G 185A 228A 263G 295T 315.1C 462T 489C 522d 523d             | J    |
| 9356 | B | 5  | Navarra-France | 16298C 16390A 16519C                      | 073G 263G 309.1C 315.1C                                         | V    |
| 9357 | A | 1  | Bigorre        | 16183c 16189C 16311C 16362T/C             | 263G 309.1C 315.1C                                              | HV   |
| 9361 | A | 1  | Bigorre        | 16519C                                    | 152C 194T 263G 315.1C                                           | H    |
| 9369 | A | 1  | Bigorre        | 16111T 16126C 16294T 16304C 16519C        | 073G 263G 309.1C 315.1C 523.1C 523.2A                           | T    |
| 9370 | A | 1  | Bigorre        | 16176T 16219G 16519C                      | 146C 257G 263G 309.1C 309.2C 315.1C 477C                        | H    |
| 9373 | B | 6  | Soule          | 16192T 16270T 16319A                      | 073G 150T 263G 315.1C 533G                                      | U    |
| 9404 | B | 6  | Soule          | 16192T 16270T 16319A                      | 073G 150T 263G 315.1C 533G                                      | U    |
| 9406 | D | 9  | Navarra NW     | 16172C                                    | 263G 315.1C                                                     | H    |
| 9432 | D | 13 | Biscaye        | 16240G 16298T                             | 072C 263G 309.1C 315.1C                                         | V    |
| 9438 | C | 12 | Araba          | 16224C 16311C 16519C                      | 073G 114T 200G 263G 315.1C 497T 522d 523d                       | K    |
| 9444 | D | 11 | Guipuscoa SW   | 16298C                                    | 072C 195C 263G 309.1C 315.1C                                    | HV   |
| 9445 | D | 13 | Biscaye        | 16129A 16488T 16519C                      | 263G 309.1C 315.1C                                              | H    |
| 9449 | D | 13 | Biscaye        | 16129A 16519C                             | 150T 263G 309.1C 309.2C 315.1C                                  | H    |
| 9451 | D | 11 | Guipuscoa SW   | 16223T 16311C 16399G                      | 073G 146C 153G 263G 315.1C 523.1C 523.2A                        | L3'4 |
| 9457 | D | 11 | Guipuscoa SW   | 16075C 16189C 16298C                      | 072C 195C 200G 263G 309.1C 309.2C 315.1C                        | V    |
| 9461 | D | 11 | Guipuscoa SW   | 16311C 16519C                             | 263G 315.1C                                                     | H    |
| 9470 | D | 13 | Biscaye        | 16183c 16189C 16223T 16255A 16278T 16519C | 073G 153G 195C 225A 227G 263G 315.1C                            | X    |
| 9478 | D | 13 | Biscaye        | 16221T 16291T                             | 263G 309.1C 315.1C                                              | HV   |
| 9534 | B | 5  | Navarra-France | 16291T 16519C                             | 263G 309.1C 315.1C                                              | H    |
| 9537 | B | 4  | Labourdin      | 16192T 16270T 16319A                      | 073G 150T 263G 315.1C 533G                                      | U    |
| 9540 | B | 4  | Labourdin      | 16129A 16298C 16519C                      | 150T 263G 309.1C 309.2C 315.1C                                  | H    |
| 9541 | B | 4  | Labourdin      | 16069T 16126C 16148T 16193T 16278T        | 073G 150T 152C 263G 295T 315.1C 489C                            | J    |
| 9551 | D | 10 | Guipuscoa      | 16189C 16356C 16519C                      | 263G 309.1C 309.2C 315.1C                                       | H    |
| 9565 | B | 6  | Soule          | 16304C 16519C                             | 263G 309.1C 309.2C 315.1C 456T 513A 522d 523d                   | H    |
| 9579 | B | 4  | Labourdin      | 16181c 16182c 16183c 16189C 16519C        | 073G 146C 153G 234G 315.1C 522d 523d                            | X    |
| 9602 | B | 5  | Navarra-France | 16217C 16218T 16519C                      | 263G 309.1C 309.2C 315.1C                                       | H    |
| 9612 | B | 5  | Navarra-France | 16093C 16172C 16224C 16311C 16519C        | 073G 114T 152C 263G 315.1C 497T                                 | K    |
| 9615 | A | 3  | Chalosse       | 16129A 16298C 16390A 16519C               | 246C 263G 309.1C 315.1C                                         | V    |
| 9618 | C | 7  | Navarra NE     | 16069T 16126C 16300G                      | 073G 185A 228A 263G 295T 315.1C 462T 489C 522d 523d             | J    |
| 9638 | C | 7  | Navarra NE     | 16256T 16270T 16399G                      | 073G 263G 309.1C 315.1C                                         | U    |
| 9642 | B | 5  | Navarra-France | 16129A 16519C                             | 093G 185A 263G 315.1C                                           | H    |
| 9648 | B | 5  | Navarra-France | 16192T 16270T 16319A                      | 073G 150T 263G 315.1C 533G                                      | U    |
| 9659 | B | 5  | Navarra-France | 16298C 16390A 16519C                      | 263G 315.1C 493G                                                | V    |
| 9680 | A | 1  | Bigorre        | 16111T 16126C 16294T 16304C 16519C        | 073G 263G 309.1C 315.1C                                         | T    |
| 9688 | A | 1  | Bigorre        | 16192T 16270T 16319A                      | 073G 150T 263G 315.1C 533G                                      | U    |
| 9697 | A | 1  | Bigorre        | 16126C 16129A 16264T 16295T 16311C 16362C | 060.1T 064T 195C 263G 309.1C 315.1C 522d 523d 573.XC            | R0   |
| 9698 | A | 1  | Bigorre        | 16192T 16224C 16311C 16519C               | 073G 263G 315.1C 497T 523.1C 523.2A                             | K    |
| 9707 | B | 5  | Navarra-France | 16519C                                    | 239C 263G 309.1C 309.2C 315.1C                                  | H    |
| 9729 | B | 5  | Navarra-France | 16192T 16270T 16319A                      | 056.1C 058C 073G 150T 263G 315.1C 533G                          | U    |
| 9734 | B | 5  | Navarra-France | 16240G 16298C                             | 072C 263G 309.1C 315.1C                                         | V    |
| 9743 | C | 7  | Navarra NE     | 16298C 16390A 16519C                      | 198T 263G 309.1C 315.1C                                         | V    |
| 9752 | C | 7  | Navarra NE     | 16126C 16294T 16296T 16519C               | 073G 263G 315.1C                                                | T    |

|        |   |    |              |                                                  |                                                     |    |
|--------|---|----|--------------|--------------------------------------------------|-----------------------------------------------------|----|
| 9765   | C | 7  | Navarra NE   | 16298C 16390A 16519C                             | 198T 263G 309.1C 315.1C                             | V  |
| 9795   | B | 6  | Soule        | 16069T 16126C 16300G                             | 073G 185A 228A 263G 295T 315.1C 462T 489C 522d 523d | J  |
| 9802   | B | 6  | Soule        | 16192T 16270T 16319A                             | 073G 150T 263G 315.1C 533G                          | U  |
| 9803   | B | 6  | Soule        | 16192T 16270T 16319A                             | 073G 150T 263G 315.1C 533G                          | U  |
| 9805   | A | 1  | Bigorre      | 16354T                                           | 263G 309.1C 315.1C                                  | H  |
| 9806   | F | 18 | Aragon       | 16189C 16223T 16278T 16519C                      | 073G 153G 195C 225A 226C 263G 315.1C 523.1C 523.2A  | X  |
| 9817   | F | 18 | Aragon       | 16192T 16270T 16319A                             | 073G 150T 263G 315.1C 533G                          | U  |
| 9871   | F | 18 | Aragon       | 16256T 16519C                                    | 263G 315.1C                                         | H  |
| 4072A  | F | 16 | Burgos       | 16183c 16189C 16223T 16278T 16294T 16309G 16390A | 073G 146C 152C 195C 263G 309.1C 309.2C 315.1C       | L2 |
| A - 10 | F | 15 | Cantabria    | 16311C 16468C 16519C                             | 182T 183G 263G 309.1C 315.1C                        | H  |
| A - 13 | C | 12 | Araba        | 16519C                                           | 263G 293C 315.1C                                    | H  |
| A - 2  | C | 12 | Araba        | 16183c 16189C 16356C 16519C                      | 263G 309.1C 315.1C                                  | H  |
| A - 3  | C | 12 | Araba        | 16519C                                           | 152C 199C 263G 315.1C 523.1C 523.2A                 | H  |
| A - 4  | D | 11 | Guipuscoa SW | GRS                                              | 072C 150T 263G 309.1C 315.1C 522d 523d              | V  |
| A - 5  | C | 12 | Araba        | 16126C 16163G 16186T 16189C 16294T 16519C        | 073G 152C 195C 263G 309.1C 315.1C                   | T  |
| A - 9  | C | 8  | Navarra CW   | 16129A 16519C                                    | 263G 309.1C 309.2C 315.1C                           | H  |

<sup>a</sup>Zone category

<sup>b</sup>Zone code

**Table S4. Absolute Frequencies of the Different Haplogroup H Subhaplogroups in the Different Zone Categories**

| Haplogroup | A | B | C  | D | E | F | Total |
|------------|---|---|----|---|---|---|-------|
| H          |   |   | 5  | 1 |   | 3 | 9     |
| H01        | 4 | 1 | 3  | 2 | 1 | 2 | 13    |
| H01a       | 1 |   |    |   |   |   | 1     |
| H01a1      |   |   | 1  |   |   |   | 1     |
| H01a3      |   |   |    | 1 |   |   | 1     |
| H01a3a     | 1 |   |    |   |   |   | 1     |
| H01ab1     | 3 |   |    |   |   |   | 3     |
| H01ag1     |   |   |    |   |   | 1 | 1     |
| H01ah1     |   |   | 2  |   |   |   | 2     |
| H01ak1     | 1 |   |    |   |   |   | 1     |
| H01ak2     |   | 2 | 3  | 2 |   |   | 7     |
| H01an1a    | 4 | 1 |    |   |   |   | 5     |
| H01aq      |   |   |    |   |   | 2 | 2     |
| H01ar      |   |   |    |   |   | 1 | 1     |
| H01at      |   | 1 |    |   |   |   | 1     |
| H01av1     |   | 2 | 1  | 6 |   | 1 | 10    |
| H01av1a    |   | 2 |    | 5 |   |   | 7     |
| H01aw      |   | 1 |    |   |   |   | 1     |
| H01b       |   |   | 3  | 3 |   | 1 | 7     |
| H01b1      |   |   |    |   |   | 1 | 1     |
| H01b4      |   |   | 1  | 3 |   |   | 4     |
| H01bb      |   |   | 1  |   |   |   | 1     |
| H01bc      |   | 1 |    |   |   |   | 1     |
| H01bf1     |   |   |    |   | 1 |   | 1     |
| H01bq      |   |   |    |   |   | 1 | 1     |
| H01bs      |   |   |    |   |   | 1 | 1     |
| H01bv1     |   |   | 2  |   |   |   | 2     |
| H01bx      | 1 | 1 | 1  |   |   |   | 3     |
| H01by      |   |   | 1  |   |   |   | 1     |
| H01c       |   |   |    | 1 |   |   | 1     |
| H01c16     |   | 1 |    |   |   |   | 1     |
| H01c3a     | 2 |   |    |   |   |   | 2     |
| H01c4a     |   | 1 |    | 4 |   |   | 5     |
| H01e1a     |   | 4 |    | 1 |   |   | 5     |
| H01e1a1    | 5 | 6 | 1  |   |   |   | 12    |
| H01e1a2    | 1 |   |    |   | 1 |   | 2     |
| H01e1a4    |   | 3 | 1  |   |   |   | 4     |
| H01e3      |   | 6 |    |   |   |   | 6     |
| H01i1      |   |   |    |   |   | 1 | 1     |
| H01j1      |   | 1 | 7  | 6 | 2 | 1 | 17    |
| H01j1a     | 1 | 1 | 1  | 2 |   | 2 | 7     |
| H01j1a1    |   |   |    | 3 |   |   | 3     |
| H01j1a2    | 2 | 3 |    |   |   |   | 5     |
| H01j1b     |   | 5 | 1  | 9 |   |   | 15    |
| H01j1c     |   |   |    | 5 |   |   | 5     |
| H01j2a     |   |   |    |   |   | 1 | 1     |
| H01o       |   | 4 |    |   |   |   | 4     |
| H01q       |   |   |    |   |   | 1 | 1     |
| H01q1      |   | 1 |    |   |   |   | 1     |
| H01q2      |   |   |    |   |   | 2 | 2     |
| H01r       |   |   |    | 2 |   |   | 2     |
| H01t1      |   |   | 2  | 1 |   |   | 3     |
| H01t1a     | 3 | 7 | 5  | 7 |   | 2 | 24    |
| H01t1a1    |   |   |    | 7 |   |   | 7     |
| H01v       |   |   |    |   |   | 1 | 1     |
| H02a1      | 1 | 3 |    |   |   |   | 4     |
| H02a1e     | 1 |   |    |   |   |   | 1     |
| H02a5a1    | 4 | 1 |    | 5 |   |   | 10    |
| H02a5a1a   | 1 | 2 | 1  | 8 |   |   | 12    |
| H03        | 1 |   | 11 | 5 |   | 5 | 22    |
| H03ab      |   |   | 1  |   |   | 2 | 3     |
| H03af      |   |   |    |   |   | 1 | 1     |
| H03ah      |   |   |    |   |   | 1 | 1     |
| H03ai      |   |   | 1  |   |   |   | 1     |
| H03am      |   | 2 | 2  |   |   | 1 | 5     |
| H03ao      |   |   |    |   |   | 2 | 2     |
| H03at      | 1 |   |    |   |   |   | 1     |
| H03at1     |   |   |    | 5 |   |   | 5     |
| H03au      |   |   | 1  |   |   |   | 1     |
| H03av      |   |   | 2  |   | 1 | 2 | 5     |

|            |    |    |    |     |    |    |     |
|------------|----|----|----|-----|----|----|-----|
| H03c       |    |    |    |     | 1  | 1  | 2   |
| H03c2a     | 1  | 3  | 4  | 3   |    |    | 11  |
| H03c2a1    |    | 3  |    |     |    |    | 3   |
| H03c2c     |    |    |    | 3   |    |    | 3   |
| H03e       |    |    |    | 1   |    |    | 1   |
| H03h       |    |    |    |     | 1  |    | 1   |
| H03k       | 1  |    |    |     |    |    | 1   |
| H03n       | 1  |    |    |     |    | 1  | 2   |
| H03s       | 1  |    |    |     |    |    | 1   |
| H03x       |    |    |    | 1   |    | 1  | 2   |
| H03y       |    |    |    |     |    | 2  | 2   |
| H03z1      |    |    | 1  |     |    |    | 1   |
| H04a1      |    |    |    |     |    | 2  | 2   |
| H04a1a     |    |    |    |     |    | 1  | 1   |
| H04a1a1a1a |    |    |    | 1   |    |    | 1   |
| H04a1a1a4  |    | 2  |    | 1   |    |    | 3   |
| H04a1a4a   |    |    |    | 1   | 1  |    | 2   |
| H04a1a4b   | 1  |    |    |     |    |    | 1   |
| H05        | 1  |    |    |     |    | 1  | 2   |
| H05'36     |    |    | 1  |     |    |    | 1   |
| H05'36?    | 1  |    |    |     |    |    | 1   |
| H05a       |    |    |    |     |    | 1  | 1   |
| H05a1      |    | 1  |    |     |    | 1  | 2   |
| H05a3a1    |    | 3  |    | 4   |    | 1  | 8   |
| H05e       |    |    |    |     |    | 1  | 1   |
| H05j       |    | 1  |    |     |    |    | 1   |
| H06a1a     | 2  | 1  |    | 1   |    |    | 4   |
| H06a1a2b   | 1  |    |    |     |    |    | 1   |
| H06a1a7    |    | 1  |    | 1   |    |    | 2   |
| H06a1b2d   |    |    |    | 2   |    |    | 2   |
| H06a2      | 1  |    |    |     |    |    | 1   |
| H07d2      |    |    | 1  |     |    |    | 1   |
| H07d3      |    |    | 1  |     |    |    | 1   |
| H08b       | 1  |    |    |     |    |    | 1   |
| H09a       | 1  |    |    |     |    |    | 1   |
| H10        |    |    |    |     |    | 1  | 1   |
| H13a1a1    | 4  |    |    |     |    | 1  | 5   |
| H14b1      | 1  |    |    | 2   |    |    | 3   |
| H15a1      |    |    |    |     | 1  |    | 1   |
| H15a1b     |    |    |    |     | 2  |    | 2   |
| H17        |    |    |    | 1   |    |    | 1   |
| H17a       |    |    |    | 2   |    |    | 2   |
| H20        |    | 2  |    |     |    |    | 2   |
| H24        |    |    |    | 1   | 1  |    | 2   |
| H24b       |    | 1  |    | 1   |    |    | 2   |
| H27        |    |    | 1  |     |    | 1  | 2   |
| H30b1      |    |    |    |     |    | 2  | 2   |
| H42a       |    |    | 1  |     |    |    | 1   |
| H42a1      | 1  | 1  | 4  |     |    | 1  | 7   |
| H49        |    |    | 1  |     |    |    | 1   |
| H51        |    |    |    |     |    | 1  | 1   |
| H53        |    |    |    | 3   |    |    | 3   |
| H58a       |    |    | 1  | 1   |    | 1  | 3   |
| H59        | 1  |    |    |     |    |    | 1   |
| H67a       | 1  |    |    |     |    |    | 1   |
| H74        | 2  |    |    |     |    |    | 2   |
| H81        |    |    | 1  |     |    |    | 1   |
| H86        |    |    |    | 1   |    |    | 1   |
| H87        |    |    |    |     | 1  |    | 1   |
| Total      | 61 | 82 | 78 | 125 | 14 | 60 | 420 |
